# Supplementary material for: The histone modification reader ZCWPW1 links histone methylation to PRDM9-induced double-strand break repair
Source: eLife. 2020 May 6;9:e53459. doi: 10.7554/eLife.53459 (PMC7314539; doi:10.7554/eLife.53459)
Supplement: Figure 1—figure supplement 2—source data 1. [file elife-53459-fig1-figsupp2-data1.xlsx]

## Sheet: Source_Fig1_S2C
	Number of sysnapsis chromosome per cell	WT	Zcwpw1-/-	Zcwpw1KI/KI
Zytotene	1		11	9
	2		12	10
	3		10	13
	4	4	9	11
	5	3	9	8
	6	4	11	9
	7		12	11
	8		9	8
	9	1	15	13
	10		15	16
	11	1	11	10
	12		8	7
	13	1	3	4
	14	1	6	7
	15		8	9
	16		7	6
	17		4	5
	18	1	3	2
	19		1
Pachytene	20	153
