# Supplementary material for: The histone modification reader ZCWPW1 links histone methylation to PRDM9-induced double-strand break repair
Source: eLife. 2020 May 6;9:e53459. doi: 10.7554/eLife.53459 (PMC7314539; doi:10.7554/eLife.53459)
Supplement: Figure 1—figure supplement 3—source data 1. [file elife-53459-fig1-figsupp3-data1.xlsx]

## Sheet: Source_Fig1_S3B
ZCW-WT		Zcwpw1KI/KI
Zygotene(n=16)	Pachytene(n=15)	Zygotene(n=13)	Pachytene-like(n=17)
46	17	43	31
51	24	50	35
59	26	58	39
64	29	62	45
73	33	78	48
75	34	82	51
79	38	87	58
81	42	93	65
83	49	98	68
86	57	105	73
90	61	113	82
97	64	121	86
108	72	132	97
114	77		106
123	81		115
135			124
			127

## Sheet: Source_Fig1_S2D
WT		Zcwpw1KI/KI
Zygotene(n=20)	Pachytene(n=14)	Zygotene(n=17)	Pachytene-like(n=16)
27	23	31	39
35	26	38	43
46	29	43	49
51	34	56	52
59	37	61	57
63	41	69	63
69	45	73	69
74	47	78	72
78	51	82	76
79	56	87	81
83	61	92	85
85	65	94	90
91	71	107	94
94	76	113	99
102		117	105
115		121	113
119		127
121
127
131
