# Supplementary material for: The histone modification reader ZCWPW1 links histone methylation to PRDM9-induced double-strand break repair
Source: eLife. 2020 May 6;9:e53459. doi: 10.7554/eLife.53459 (PMC7314539; doi:10.7554/eLife.53459)
Supplement: Figure 1—source data 1. [file elife-53459-fig1-data1.xlsx]

## Sheet: Source_1D
WT			Zcwpw1KI/KI
Leptotene(n=12)	Zygotene(n=25)	Pachytene(n=16)	Leptotene(n=13)	Zygotene(n=23)	Pachytene-like(n=17)
53	59	28	55	55	51
62	69	35	63	63	61
75	87	47	69	76	76
78	98	51	75	89	81
81	119	65	83	93	85
85	128	69	87	118	97
91	135	73	93	126	113
95	137	75	96	131	119
97	143	81	99	135	125
105	146	89	113	143	133
113	149	95	125	146	139
128	150	97	129	149	148
	155	113	135	157	159
	162	121		159	167
	165	138		168	178
	169	145		179	185
	173			183	196
	175			191
	179			205
	180			216
	184			227
	195			229
	213			234
	221
	225

## Sheet: Source_1F
WT			Zcwpw1KI/KI
Leptotene(n=13)	Zygotene(n=20)	Pachytene(n=18)	Leptotene(n=14)	Zygotene(n=20)	Pachytene-like(n=19)
43	53	19	39	51	56
52	67	23	42	62	67
59	86	27	51	79	71
63	91	34	60	87	75
67	107	43	71	95	79
72	113	47	73	117	84
78	125	50	75	123	91
86	128	52	81	135	96
95	134	57	84	139	97
103	142	62	91	140	103
112	145	65	95	146	108
119	151	71	105	148	112
126	159	76	118	157	115
	161	79	123	163	125
	167	83		167	129
	172	87		175	137
	179	92		181	141
	195	97		195	147
	208			209	153
	221			217
