# Supplementary material for: The histone modification reader ZCWPW1 links histone methylation to PRDM9-induced double-strand break repair
Source: eLife. 2020 May 6;9:e53459. doi: 10.7554/eLife.53459 (PMC7314539; doi:10.7554/eLife.53459)
Supplement: Supplementary file 1. [file elife-53459-supp1.xlsx]

## Sheet: Sheet1
Summary of all ChIP-seq experiments performed, indicating antibodies, samples, reolicate, genotype and data source.
Target	Sample	Replicate	Genotype	Number of mice	Data source
ZCWPW1	Whole testis	R1	WT	2	This paper
Zcwpw1	Whole testis	R2	WT	2	This paper
Zcwpw1	Whole testis	R1	Zcwpw1-/-	2	This paper
Zcwpw1	Whole testis	R2	Zcwpw1-/-	2	This paper
Zcwpw1	Whole testis	R1	Zcwpw1KI/KI	2	This paper
Zcwpw1	Whole testis	R2	Zcwpw1KI/KI	2	This paper
Zcwpw1	Whole testis	R1	Prdm9-/-	2	This paper
Zcwpw1	Whole testis	R2	Prdm9-/-	2	This paper
H3K4me3	Whole testis	R1	WT	2	This paper
H3K4me3	Whole testis	R2	WT	2	This paper
H3K4me3	SCP3+H1T- spermatocytes		WT		Lam et al. 2019
H3K4me3	Whole testis	R1	Prdm9-/-	2	This paper
H3K4me3	Whole testis	R2	Prdm9-/-	2	This paper
H3K36me3	Whole testis		WT		Grey et al. 2017
H3K36me3	SCP3+H1T- spermatocytes		WT		Lam et al. 2019
PRDM9	Whole testis		WT		Grey et al. 2017
PRDM9	Whole testis		WT		Walker et al. 2015
DMC1-ssDNA	Whole testis		WT		Grey et al. 2017
SPO11-oligo	Whole testis		WT		Lange et al. 2016
