# Supplementary material for: The histone modification reader ZCWPW1 links histone methylation to PRDM9-induced double-strand break repair
Source: eLife. 2020 May 6;9:e53459. doi: 10.7554/eLife.53459 (PMC7314539; doi:10.7554/eLife.53459)
Supplement: Supplementary file 2. [file elife-53459-supp2.xlsx]

## Sheet: ZCWPW1 peaks in WT
chr	start	end	fold change(peak intensity)
chr1	3125522	3126358	3.99478
chr1	3658366	3659080	5.62956
chr1	4609435	4610738	9.55301
chr1	4923126	4924490	5.38845
chr1	5026839	5028478	15.0034
chr1	5121891	5122963	10.5339
chr1	5156338	5158008	12.3145
chr1	5524519	5526724	14.7843
chr1	6446073	6446626	3.66783
chr1	6670730	6671028	3.01392
chr1	6819516	6819765	3.50435
chr1	6819885	6820356	4.90942
chr1	9744009	9744769	3.17739
chr1	9744970	9745774	4.61074
chr1	9745991	9746191	3.26344
chr1	9747059	9748091	5.15637
chr1	9942193	9944100	7.30162
chr1	10028366	10028848	5.4914
chr1	10088407	10090465	15.5999
chr1	10133449	10133977	3.34087
chr1	10162202	10163906	12.986
chr1	10452352	10453408	5.50449
chr1	10615854	10617372	9.44983
chr1	10808601	10809651	8.08172
chr1	11139726	11140435	4.32174
chr1	11545044	11547642	14.6716
chr1	13026112	13026631	5.46608
chr1	13052214	13052463	3.8313
chr1	13129134	13129600	5.95651
chr1	13311398	13312563	5.6949
chr1	13845217	13846781	14.264
chr1	14227387	14228004	4.32174
chr1	14749265	14750770	7.12904
chr1	15122126	15122778	3.99478
chr1	15489448	15490615	6.61042
chr1	16103947	16104160	3.65976
chr1	16179921	16180201	3.01392
chr1	16343251	16343524	3.99478
chr1	16366670	16367158	4.64869
chr1	16561323	16561623	3.1837
chr1	17080906	17081302	3.76389
chr1	17327673	17328143	3.50435
chr1	18170379	18171484	5.46608
chr1	18493575	18495229	8.6941
chr1	18791679	18791944	3.66783
chr1	18979647	18980892	10.2069
chr1	19133876	19134480	6.44694
chr1	19172790	19173502	6.28347
chr1	19504104	19504783	4.15826
chr1	19894794	19895304	3.50435
chr1	20217696	20219101	5.96864
chr1	20640408	20640684	3.01392
chr1	20818428	20819181	4.43997
chr1	21127251	21127505	4.15826
chr1	21332294	21333478	12.6591
chr1	21436554	21437376	5.04033
chr1	21620450	21622436	15.2747
chr1	21731862	21733055	9.87997
chr1	21805191	21806010	5.3026
chr1	21917689	21919222	17.5634
chr1	22061248	22062898	19.5251
chr1	22099104	22100638	12.036
chr1	22198340	22199469	6.44694
chr1	22369627	22371085	13.64
chr1	22844611	22846752	10.7263
chr1	22946222	22947808	15.6017
chr1	23004350	23004604	3.34087
chr1	23047818	23048755	7.91824
chr1	23343236	23344576	14.1304
chr1	23376051	23376591	3.53181
chr1	23515482	23516664	6.46614
chr1	23536210	23537359	13.9669
chr1	24083074	24084943	23.1216
chr1	24104748	24105299	4.79517
chr1	24223827	24224156	3.8313
chr1	24451496	24452138	5.79303
chr1	24531936	24532631	4.81217
chr1	25239308	25240596	10.2069
chr1	25383979	25385063	8.8991
chr1	25519466	25520037	4.64869
chr1	25531605	25532610	6.44694
chr1	25534245	25535607	12.1686
chr1	25544034	25544402	3.68119
chr1	26246994	26247675	4.32174
chr1	26387678	26388908	4.81217
chr1	27251670	27252528	5.13912
chr1	28035206	28035939	3.8313
chr1	29077175	29078709	11.3398
chr1	29780706	29781500	5.21291
chr1	30700365	30700617	3.66783
chr1	30839668	30839929	3.99478
chr1	30851332	30853144	15.1113
chr1	30948195	30948432	4.13778
chr1	31060425	31060929	4.97565
chr1	31404516	31406719	21.8828
chr1	32078586	32079693	4.64869
chr1	32242465	32243308	5.4914
chr1	32310310	32312570	15.4382
chr1	32866708	32868796	14.9478
chr1	33366625	33367752	9.38954
chr1	33546246	33546645	3.99478
chr1	33564574	33565341	5.79303
chr1	33763943	33766184	18.9651
chr1	33774164	33774942	7.42781
chr1	34143541	34144136	6.04839
chr1	34144339	34145099	8.83334
chr1	34376231	34377336	8.98567
chr1	35180317	35181915	11.5147
chr1	35192219	35192591	3.1837
chr1	35230774	35232313	14.1304
chr1	35305683	35306633	7.10085
chr1	35315594	35316338	5.46608
chr1	35337503	35337754	3.34087
chr1	35575346	35575916	6.59051
chr1	35604912	35605362	3.50435
chr1	35722170	35723359	10.9221
chr1	35728438	35729558	11.8417
chr1	35826376	35827141	3.62404
chr1	36221864	36223383	17.1882
chr1	36342700	36343929	6.21007
chr1	36555250	36556532	6.54884
chr1	36682310	36683183	4.2814
chr1	36760525	36761328	6.74463
chr1	36885581	36888083	37.1807
chr1	36903657	36905025	10.9873
chr1	37156884	37157550	5.46608
chr1	37350188	37351229	7.99786
chr1	37388155	37389439	10.8608
chr1	37397307	37398095	7.42781
chr1	37398228	37398428	3.66783
chr1	37616217	37617821	11.7411
chr1	37671281	37672496	20.9964
chr1	38008207	38009442	9.71649
chr1	38095545	38096179	4.3414
chr1	38220959	38222005	8.08172
chr1	38223166	38224606	13.4765
chr1	38311433	38312892	11.3513
chr1	38680305	38680858	4.97435
chr1	39021554	39023170	13.8335
chr1	39154970	39155261	3.17739
chr1	39229751	39231480	23.939
chr1	39262333	39262853	4.48521
chr1	39367818	39368758	7.89595
chr1	39540126	39541746	24.733
chr1	39557397	39558805	16.746
chr1	39614485	39614851	4.97565
chr1	39637757	39638700	6.11999
chr1	39901494	39901877	3.50435
chr1	39902293	39902670	3.50435
chr1	39936379	39937751	22.164
chr1	39983955	39985395	16.5256
chr1	40109771	40111306	8.79609
chr1	40294867	40296621	19.0347
chr1	40469482	40469753	3.8313
chr1	40488760	40489854	11.1904
chr1	40536479	40537219	8.57215
chr1	40592444	40593364	6.93738
chr1	40815889	40816802	5.95651
chr1	40948115	40948439	3.26344
chr1	41648736	41649626	5.62956
chr1	41654750	41654988	3.50435
chr1	41660964	41661206	3.55022
chr1	41792961	41793862	5.13912
chr1	42020693	42021210	5.46608
chr1	42021428	42022564	27.2086
chr1	42255409	42256306	5.4914
chr1	42514885	42515854	10.5339
chr1	42825101	42826494	13.4765
chr1	43172930	43174574	16.8471
chr1	43453902	43454468	3.66783
chr1	43511867	43513032	8.35971
chr1	43685414	43687296	11.0837
chr1	43864110	43864996	6.93738
chr1	43935382	43935891	3.26342
chr1	44027711	44028310	4.60671
chr1	44101249	44102414	5.79303
chr1	44179543	44180214	3.82043
chr1	44203697	44204758	8.40867
chr1	44473697	44474625	6.28347
chr1	44661811	44662653	3.02727
chr1	45345316	45346789	16.2556
chr1	45837888	45838757	4.37742
chr1	45872609	45872835	3.8313
chr1	46133485	46133691	3.8313
chr1	46199739	46200910	7.59129
chr1	46624490	46625083	4.93441
chr1	46625270	46625635	3.99478
chr1	46830052	46830692	3.34087
chr1	46907263	46908853	20.0156
chr1	46914270	46915504	15.3679
chr1	47578904	47579759	4.64869
chr1	47820612	47821732	8.57215
chr1	48542496	48543107	4.32174
chr1	48814001	48814855	9.06258
chr1	49624153	49624947	6.44694
chr1	50316139	50317006	4.97565
chr1	51062930	51063208	3.39587
chr1	51376385	51376958	3.50435
chr1	51382105	51383283	5.73657
chr1	52017291	52018860	18.8712
chr1	52422039	52422835	3.25807
chr1	52538713	52539451	4.97565
chr1	53215267	53216420	14.6526
chr1	53321916	53323210	9.39033
chr1	53339527	53340027	3.50435
chr1	53907371	53908812	8.1734
chr1	54307775	54309046	10.3704
chr1	54468982	54469902	8.8991
chr1	54478397	54480226	10.3875
chr1	54564190	54564766	4.97565
chr1	54739644	54740964	13.0108
chr1	55011493	55012764	5.01652
chr1	55026329	55026554	3.53543
chr1	55026670	55027354	3.05078
chr1	55052989	55053419	4.18317
chr1	55233481	55234816	6.7739
chr1	55307539	55310088	16.9924
chr1	55338147	55338775	5.13912
chr1	55345109	55345947	5.3026
chr1	55890637	55891043	3.50435
chr1	56244870	56245223	4.81217
chr1	56291562	56291762	3.17739
chr1	57378143	57378424	3.09315
chr1	57673019	57673276	3.1242
chr1	57673372	57673573	3.34087
chr1	57766149	57766488	3.26344
chr1	58097487	58098901	14.1421
chr1	58394019	58394277	3.40269
chr1	58402947	58403574	3.40269
chr1	58419183	58422369	19.4386
chr1	58422537	58423934	8.54197
chr1	58437245	58439362	25.2468
chr1	58555772	58557482	7.60254
chr1	58574479	58574924	6.04839
chr1	58964906	58965442	5.62956
chr1	58966853	58967084	3.39199
chr1	59149542	59151003	14.7843
chr1	59157342	59158116	6.61042
chr1	59162691	59163272	3.99478
chr1	59248623	59250814	29.0242
chr1	59358533	59360413	21.1599
chr1	59402933	59404063	8.08172
chr1	59669699	59669899	3.50435
chr1	59684991	59685887	4.304
chr1	59686053	59686315	3.5396
chr1	59752407	59752976	4.15826
chr1	59771462	59771907	4.32174
chr1	59772035	59773674	12.0052
chr1	59856045	59857150	10.8608
chr1	59871962	59872268	3.8313
chr1	60104716	60107092	19.9351
chr1	60119523	60120346	5.7699
chr1	60271320	60273476	22.6312
chr1	60548747	60550269	11.1878
chr1	60992493	60992870	3.34087
chr1	61062058	61062375	4.32174
chr1	61078675	61079190	4.64869
chr1	61277812	61279073	5.7699
chr1	61421402	61422410	8.08172
chr1	61545202	61547090	14.9478
chr1	61697520	61698385	7.59129
chr1	61795493	61798114	34.7285
chr1	61820172	61820444	3.34087
chr1	61871435	61873113	23.7755
chr1	61916518	61917494	7.10085
chr1	62089007	62089596	4.93441
chr1	62122349	62123656	10.03
chr1	62127414	62128287	5.79303
chr1	62350744	62351320	4.48521
chr1	62580289	62581444	7.42781
chr1	62590883	62592429	16.5825
chr1	62775831	62777602	31.6225
chr1	62784652	62785876	9.39033
chr1	62922758	62923226	4.81217
chr1	63150834	63153265	15.2612
chr1	63250729	63250952	3.17739
chr1	63251092	63252264	6.73925
chr1	63364749	63365512	6.18764
chr1	63563823	63564509	6.28347
chr1	63667205	63668051	4.46013
chr1	63726823	63727623	5.46608
chr1	63937465	63938264	3.53181
chr1	64071616	64072663	7.02313
chr1	64105176	64106366	7.42246
chr1	64321404	64322366	6.44694
chr1	64336050	64337303	15.7652
chr1	64533585	64534133	3.80036
chr1	64538106	64538380	3.34087
chr1	64563052	64563901	4.48521
chr1	64690696	64690933	3.1242
chr1	64693684	64695858	22.4796
chr1	64706587	64706858	4.32174
chr1	64734780	64735207	4.32174
chr1	64759970	64760958	7.75476
chr1	64803144	64804856	23.1758
chr1	64852422	64853833	9.68191
chr1	64943887	64944917	4.97565
chr1	65137588	65139283	15.2747
chr1	65158938	65160617	16.746
chr1	65189993	65191323	5.43381
chr1	65221231	65222959	16.9095
chr1	65407967	65409865	18.7078
chr1	66196027	66198007	15.5999
chr1	66341286	66343159	21.3234
chr1	66416228	66416917	4.48521
chr1	66452176	66453391	10.6102
chr1	66709136	66709344	3.50435
chr1	66937725	66939941	26.0642
chr1	67025950	67027618	13.5678
chr1	67227950	67228849	6.11999
chr1	67391554	67392581	4.45536
chr1	67460121	67460838	5.46608
chr1	67544346	67545573	11.3513
chr1	67797984	67799370	8.6941
chr1	67934619	67936571	16.4191
chr1	67960692	67964006	32.1129
chr1	68108363	68109041	4.57617
chr1	68226955	68228026	5.13912
chr1	68487858	68490397	34.0746
chr1	68918614	68918902	4.15826
chr1	68936038	68937917	24.7564
chr1	69047859	69049386	10.5339
chr1	69307757	69310036	27.699
chr1	69315047	69316461	13.15
chr1	69418443	69419843	10.0434
chr1	69591239	69592700	15.2747
chr1	70059964	70060224	3.66783
chr1	70064175	70064669	3.34087
chr1	70551577	70551978	5.62956
chr1	70731435	70732209	7.26433
chr1	71061323	71061738	4.32174
chr1	71064688	71066485	13.3952
chr1	71098342	71099378	5.95651
chr1	71308141	71309285	9.38954
chr1	71428008	71429332	7.91824
chr1	71487447	71487911	4.97565
chr1	72084689	72085178	4.93441
chr1	72183224	72184593	10.0866
chr1	72279831	72281066	8.05736
chr1	72301915	72302877	4.97565
chr1	72313648	72314117	4.81611
chr1	72353297	72354591	9.44983
chr1	72367727	72368806	9.38954
chr1	72410457	72410993	7.26433
chr1	72487078	72487970	4.32174
chr1	72496194	72497447	12.1686
chr1	72711395	72711634	3.99597
chr1	73102562	73103457	9.06258
chr1	73219368	73220732	19.0347
chr1	73406468	73408217	14.4573
chr1	73801634	73802262	3.8313
chr1	73904815	73905038	3.34087
chr1	73979113	73980702	18.8592
chr1	74054683	74055032	3.8313
chr1	74172065	74172538	4.32174
chr1	74303949	74304155	3.17739
chr1	74314984	74315289	4.45536
chr1	74662914	74663140	3.26344
chr1	74903746	74904525	3.95968
chr1	74927519	74928687	10.6436
chr1	74972745	74974602	17.8047
chr1	74991689	74992680	8.08172
chr1	75011136	75013039	28.3525
chr1	75047827	75049423	17.2043
chr1	75138816	75140523	17.3221
chr1	75143129	75143431	3.02171
chr1	75296712	75298072	9.22606
chr1	75758636	75759539	7.59129
chr1	75978222	75979363	13.1495
chr1	75993651	75994936	11.479
chr1	76448004	76448775	5.63065
chr1	76523023	76523780	3.41577
chr1	76636646	76637211	4.15826
chr1	76974363	76975919	21.4869
chr1	77048067	77048285	3.84993
chr1	77048438	77048731	4.51667
chr1	77136274	77137667	13.9669
chr1	77429214	77430109	6.20072
chr1	77700007	77700928	9.87997
chr1	78174376	78175897	14.7843
chr1	78186545	78187776	9.22606
chr1	78269872	78270757	6.7739
chr1	78316379	78317817	7.16237
chr1	78590272	78591682	10.3704
chr1	78614298	78615180	8.83334
chr1	78979343	78979984	5.46608
chr1	79619642	79620143	5.3026
chr1	79686731	79687563	3.06766
chr1	79795040	79795992	5.62956
chr1	80009599	80010110	4.09893
chr1	80237463	80239157	24.5929
chr1	80289142	80289977	3.8313
chr1	80296957	80299425	19.7773
chr1	80338226	80338592	3.34087
chr1	80339268	80340648	3.12673
chr1	80511401	80511848	3.97962
chr1	80757411	80757687	3.87993
chr1	80903792	80904723	8.40867
chr1	81057378	81058361	7.75476
chr1	81083886	81084338	5.62956
chr1	81488937	81490326	10.6436
chr1	81705044	81705874	5.95651
chr1	82045789	82046286	3.99478
chr1	82053797	82056063	19.1383
chr1	82828552	82829031	3.1242
chr1	82835982	82836985	4.41974
chr1	83000867	83001123	3.99478
chr1	83047830	83048336	3.82043
chr1	83389360	83390776	4.44325
chr1	83689021	83691026	21.3234
chr1	83740955	83741375	3.68119
chr1	84217143	84218650	17.2365
chr1	84486861	84487899	7.44087
chr1	84584924	84586017	8.40867
chr1	84792878	84793279	3.99478
chr1	84803964	84809031	40.8965
chr1	84809763	84812570	25.2468
chr1	84814598	84816333	8.19932
chr1	84832371	84833209	4.75807
chr1	84838009	84838713	5.07366
chr1	84842831	84844616	15.2016
chr1	84885414	84886082	4.09893
chr1	85090349	85091051	3.75676
chr1	85620004	85620932	10.5043
chr1	85621343	85621907	13.707
chr1	85717203	85718870	21.1599
chr1	85774015	85775582	13.4285
chr1	86086637	86089586	30.2775
chr1	86207391	86208345	8.40867
chr1	86216393	86219679	40.164
chr1	86345870	86347177	11.5147
chr1	86358009	86358535	3.90841
chr1	86412471	86412931	3.76389
chr1	86432692	86433321	3.92424
chr1	86526852	86529591	8.48527
chr1	86764080	86766278	33.933
chr1	86791985	86793649	10.5339
chr1	86945497	86945812	4.15826
chr1	86982702	86985088	29.5146
chr1	87021457	87022657	10.2258
chr1	87095988	87097447	20.9479
chr1	87227608	87228240	3.66783
chr1	87238616	87240927	9.10171
chr1	87285674	87287781	24.8468
chr1	87339380	87341060	18.703
chr1	87412371	87412781	3.8313
chr1	87437625	87439527	31.6225
chr1	87439990	87441004	6.44694
chr1	87651463	87652224	4.48521
chr1	87769832	87770989	8.27635
chr1	87956816	87957294	3.82043
chr1	87973231	87973434	3.8313
chr1	87984098	87984714	4.32174
chr1	88083283	88085031	10.3704
chr1	88151137	88151752	4.23818
chr1	88260020	88261471	8.08324
chr1	88498685	88500327	22.7947
chr1	88503044	88503731	3.26344
chr1	88586275	88587350	5.51383
chr1	88619990	88621626	16.6443
chr1	89039948	89040671	4.48521
chr1	89556983	89557826	8.22255
chr1	89559162	89559643	4.67914
chr1	89799827	89801269	11.4392
chr1	90090124	90091396	10.5339
chr1	90130360	90131764	10.7853
chr1	90179173	90179894	6.7739
chr1	90391696	90392841	8.13906
chr1	90591515	90592700	6.66488
chr1	90905547	90906960	34.0669
chr1	90981539	90982192	4.81217
chr1	91096303	91097573	11.5147
chr1	91268966	91270606	16.0641
chr1	91341629	91342843	12.7279
chr1	91405440	91405769	3.80739
chr1	91422382	91424100	15.5999
chr1	91529198	91531037	21.3656
chr1	91549381	91550083	3.8313
chr1	92282235	92283633	8.55485
chr1	92295821	92296147	3.26344
chr1	92344878	92346711	18.9651
chr1	92534004	92534263	3.01392
chr1	92944046	92944644	4.64869
chr1	93113474	93114526	5.7699
chr1	93234101	93235711	15.5527
chr1	93293219	93295094	17.6886
chr1	93470472	93471808	9.33379
chr1	93486072	93487712	14.1304
chr1	93552382	93553678	7.00577
chr1	93625449	93626837	14.2939
chr1	93672617	93674713	11.0613
chr1	93790103	93790981	4.93441
chr1	94029322	94029707	3.40269
chr1	94331749	94332761	8.57215
chr1	94573801	94575272	12.815
chr1	96139857	96141347	10.3704
chr1	96282469	96283747	7.75476
chr1	96349014	96349942	7.59129
chr1	96885836	96886584	5.63065
chr1	96996967	96998114	4.92429
chr1	97073001	97073372	3.99478
chr1	97073628	97073891	3.17739
chr1	97734132	97735444	15.4382
chr1	97800501	97801693	10.5339
chr1	98076885	98078034	11.0243
chr1	98561521	98562548	7.91824
chr1	98726776	98728103	10.3704
chr1	99002493	99003097	4.32174
chr1	99222778	99223424	6.44694
chr1	99540780	99542232	9.25109
chr1	99662343	99663577	8.27635
chr1	99859982	99861418	24.986
chr1	99861814	99862696	18.8712
chr1	99882508	99884423	25.7373
chr1	100023134	100024165	6.7739
chr1	100676104	100676494	3.34087
chr1	100974451	100975584	9.71649
chr1	102471256	102471780	3.66783
chr1	102482174	102483172	5.13912
chr1	103680293	103681010	6.28347
chr1	103966355	103967856	4.51921
chr1	104667498	104669461	14.1304
chr1	104775063	104776392	14.7843
chr1	104820315	104821766	7.30162
chr1	105174246	105175225	5.15637
chr1	105416932	105418502	8.57215
chr1	105517758	105518125	3.34087
chr1	105628789	105629325	3.99478
chr1	105701519	105701775	3.50435
chr1	105714305	105714602	3.23375
chr1	105812987	105813412	4.61074
chr1	105916353	105916606	3.26344
chr1	105963564	105964317	5.07366
chr1	106261768	106262995	11.6782
chr1	106315090	106317209	27.771
chr1	106389307	106390315	6.14632
chr1	106399196	106400086	8.57215
chr1	106452036	106452348	5.51485
chr1	106452462	106452869	3.95968
chr1	106587283	106588811	16.2611
chr1	106626924	106627457	3.29973
chr1	106729570	106730774	13.1495
chr1	106740569	106742220	16.2556
chr1	106752553	106753724	5.77334
chr1	106784905	106785139	3.66783
chr1	106957689	106959050	10.0717
chr1	108209030	108209762	5.95651
chr1	108379137	108380475	12.095
chr1	108655997	108657645	14.1304
chr1	108685534	108686925	12.1686
chr1	108912300	108914105	13.64
chr1	108976809	108978755	30.3146
chr1	109536538	109538899	18.8712
chr1	110071255	110071682	5.36349
chr1	110398561	110398956	4.64869
chr1	111420802	111422391	11.5147
chr1	111450757	111451951	10.3781
chr1	111735570	111736451	5.62956
chr1	111795120	111796110	7.91824
chr1	112530798	112532028	5.90915
chr1	113106886	113107497	3.08401
chr1	113328464	113328728	3.50435
chr1	113650121	113651104	8.8991
chr1	113838674	113839679	4.32028
chr1	113982649	113983626	7.02313
chr1	114279826	114280030	3.1242
chr1	114962350	114964265	13.1177
chr1	115570851	115572453	13.64
chr1	115931927	115933573	9.38954
chr1	116039402	116040327	6.11999
chr1	116520980	116522467	12.3145
chr1	116957428	116958062	4.81217
chr1	118299131	118300099	9.38954
chr1	118494221	118495347	11.7204
chr1	118498092	118499143	8.45553
chr1	118538268	118538805	5.62956
chr1	118554869	118556281	13.9669
chr1	118596699	118598816	20.8086
chr1	118708054	118708771	5.79303
chr1	118725245	118726337	7.26433
chr1	118836396	118837939	12.036
chr1	118985838	118987392	16.2135
chr1	119020743	119021372	4.32174
chr1	119276021	119276677	4.37742
chr1	119419197	119420046	3.8313
chr1	119420188	119420834	3.83186
chr1	119528419	119529294	4.32028
chr1	119558831	119560030	10.5339
chr1	119661252	119661472	3.17739
chr1	119722673	119722976	3.66783
chr1	119723163	119723583	3.66783
chr1	119768229	119770962	36.1998
chr1	119836245	119836530	3.34087
chr1	119890949	119892069	9.38954
chr1	120100563	120100889	5.95651
chr1	120190241	120191813	12.6826
chr1	120282703	120283166	4.90304
chr1	121018745	121019626	5.46608
chr1	121146307	121147843	13.8034
chr1	121313408	121313775	4.15826
chr1	121326181	121327467	5.51383
chr1	121406657	121407389	5.3026
chr1	121558255	121558885	4.48521
chr1	121808625	121810639	27.2086
chr1	122348468	122349347	5.95651
chr1	122664590	122665590	6.32689
chr1	123989023	123989905	6.11999
chr1	124617618	124617998	3.34087
chr1	124745692	124747548	22.855
chr1	124776770	124777337	3.68119
chr1	125427528	125429080	16.9097
chr1	125579500	125580571	11.5147
chr1	126136233	126137092	7.59129
chr1	126184947	126186712	14.4032
chr1	126466569	126467204	3.8313
chr1	126515047	126516130	6.76076
chr1	126654596	126656967	23.1758
chr1	126728483	126729720	10.2069
chr1	126737403	126738159	4.15826
chr1	126871954	126872918	5.13912
chr1	126947285	126947878	3.50435
chr1	127046348	127048092	9.2934
chr1	127145415	127146066	6.44694
chr1	127378360	127379179	5.79303
chr1	127518868	127519284	4.32174
chr1	127774296	127774505	3.28677
chr1	127908818	127909261	4.81217
chr1	127986674	127988698	20.9964
chr1	128010282	128011304	4.97565
chr1	128177964	128179441	12.8226
chr1	128245316	128245522	3.17659
chr1	128352840	128353639	3.76389
chr1	128437281	128437599	3.17739
chr1	128516639	128518093	14.6208
chr1	128520021	128521357	12.8715
chr1	128533214	128534464	14.152
chr1	128542727	128544836	34.0746
chr1	128789059	128790345	11.8417
chr1	129216110	129216673	4.48521
chr1	129512061	129512669	5.3026
chr1	129705439	129706775	7.013
chr1	130540229	130541524	9.55301
chr1	130717521	130717868	3.27182
chr1	130998842	130999877	4.34409
chr1	131030674	131031010	3.01392
chr1	131157382	131158454	16.9095
chr1	131206087	131207150	8.2973
chr1	131357643	131359425	18.0538
chr1	131385704	131386078	3.24451
chr1	131408893	131410952	26.7848
chr1	131453232	131453603	3.99478
chr1	131565419	131565700	4.15826
chr1	131594004	131595229	11.4225
chr1	131828877	131830090	9.10779
chr1	131910967	131911588	3.54447
chr1	132019846	132021804	28.3529
chr1	132375529	132376395	5.54996
chr1	132380808	132382816	29.6591
chr1	132523008	132524543	13.4943
chr1	132571447	132571792	3.66783
chr1	132617895	132619086	9.25109
chr1	132921262	132922110	9.22606
chr1	132989388	132990244	8.54197
chr1	133132439	133134193	4.01372
chr1	133134626	133134881	3.21654
chr1	133365625	133367153	3.64785
chr1	133390211	133390966	5.04033
chr1	133464071	133465724	13.1724
chr1	133487454	133488972	14.5649
chr1	133660193	133661187	4.00129
chr1	133695089	133695755	7.91824
chr1	133739782	133740748	9.87997
chr1	133864490	133865282	5.79303
chr1	133952179	133953457	4.36589
chr1	134071008	134072038	4.91706
chr1	134076809	134078551	5.41409
chr1	134361145	134361350	3.70846
chr1	134361517	134361717	3.09315
chr1	134416159	134416580	3.26344
chr1	134417340	134417540	3.41364
chr1	134460804	134461521	6.11999
chr1	134468338	134468540	3.50435
chr1	134492388	134493045	4.51667
chr1	134533605	134536257	20.4593
chr1	134560181	134561648	3.69322
chr1	134629464	134630447	4.46013
chr1	134670474	134672579	38.9789
chr1	134814590	134816130	13.8034
chr1	134828320	134829155	6.61042
chr1	134843414	134844457	7.59129
chr1	134903313	134905305	27.3721
chr1	134962713	134963672	3.63744
chr1	135168827	135170201	11.4392
chr1	135357217	135358312	4.12836
chr1	135481352	135483084	13.5112
chr1	135484700	135485063	4.5747
chr1	135496198	135497922	14.4655
chr1	135560920	135562353	13.8034
chr1	135962323	135963836	20.506
chr1	136009304	136010812	11.5385
chr1	136091198	136091650	4.48521
chr1	136168502	136169494	7.10085
chr1	136271402	136271920	3.66783
chr1	136313996	136315511	20.0156
chr1	136329899	136331572	12.1351
chr1	136525113	136525385	3.1837
chr1	136595000	136595853	6.61042
chr1	136601285	136602086	4.64869
chr1	136625531	136626276	3.28677
chr1	137135100	137135825	3.99478
chr1	137216498	137217102	3.8313
chr1	137363750	137364685	3.92243
chr1	137520420	137522388	16.2556
chr1	137634168	137635539	12.3259
chr1	137839416	137840047	4.32174
chr1	137856043	137857011	7.16237
chr1	138046419	138047616	7.85861
chr1	138137742	138138260	3.66783
chr1	138344642	138345377	3.8313
chr1	138709666	138710867	12.1686
chr1	138966887	138968700	8.79609
chr1	139243334	139245190	13.2893
chr1	140661163	140661982	7.91824
chr1	141100325	141101263	3.76389
chr1	141149955	141150467	5.95651
chr1	141210682	141211861	7.10085
chr1	141786676	141787002	3.34087
chr1	141968657	141969721	13.313
chr1	142166807	142168276	14.1304
chr1	142269498	142271064	12.8226
chr1	142273922	142274228	3.50435
chr1	142806611	142807910	10.3704
chr1	143274929	143275879	4.79517
chr1	143601375	143601634	4.64869
chr1	143601817	143602262	4.32174
chr1	143641578	143642310	6.28347
chr1	143652940	143655219	15.456
chr1	143789769	143790872	7.85861
chr1	143876805	143877104	3.34087
chr1	144002101	144002325	3.17739
chr1	144002452	144003560	4.37742
chr1	144094642	144095636	4.15826
chr1	144268307	144268586	3.34087
chr1	144421432	144422299	4.15826
chr1	144434973	144436274	12.3321
chr1	144484272	144484775	3.02727
chr1	144509125	144510850	10.2621
chr1	144774237	144776438	21.4869
chr1	144906555	144907264	3.8313
chr1	144953110	144953481	3.8313
chr1	144970828	144972790	23.7328
chr1	145164073	145165610	13.9908
chr1	145618375	145619761	9.80807
chr1	146964130	146964739	3.8313
chr1	147052349	147053425	7.75476
chr1	147126555	147127656	5.04033
chr1	149027406	149028253	5.92376
chr1	149028365	149028601	4.304
chr1	149036431	149036865	4.15826
chr1	149164439	149165618	6.93738
chr1	149215117	149216650	18.2173
chr1	149677118	149677712	4.81217
chr1	149930603	149931659	7.26433
chr1	150017746	150018599	6.61042
chr1	150384228	150384936	6.11999
chr1	150393636	150393857	3.27182
chr1	150405285	150406244	6.39847
chr1	150694172	150694742	3.8313
chr1	150846242	150847235	8.57215
chr1	151048369	151048942	4.22805
chr1	151268853	151270266	10.8608
chr1	151345354	151345856	4.23818
chr1	151394565	151395638	5.3026
chr1	151397476	151398471	4.32174
chr1	151674708	151675127	4.32174
chr1	151892884	151893909	7.58012
chr1	152045719	152047090	10.8608
chr1	152278581	152280087	12.1745
chr1	152432368	152434183	16.3673
chr1	152623001	152623228	3.69858
chr1	152743379	152744876	17.5982
chr1	152749101	152749811	4.12136
chr1	152754521	152756452	26.6527
chr1	152795152	152795726	4.97565
chr1	152857596	152858978	7.59129
chr1	152926972	152927284	3.66783
chr1	152969535	152970642	8.83334
chr1	153183614	153184353	7.42781
chr1	153195168	153196633	9.68191
chr1	153422071	153422827	5.62956
chr1	153425399	153425611	3.40571
chr1	153430953	153433160	24.0378
chr1	153464489	153464725	3.99478
chr1	153470089	153470356	3.13247
chr1	153476354	153476876	3.99478
chr1	153484803	153485052	3.84993
chr1	153485515	153487716	4.51921
chr1	153622695	153623764	6.08468
chr1	153640355	153640970	4.37742
chr1	153715962	153716738	5.28506
chr1	153717023	153718726	18.8592
chr1	153901146	153901435	3.27182
chr1	153913854	153915789	25.0834
chr1	154004654	154005521	5.79303
chr1	154102228	154105516	35.0119
chr1	154233885	154235272	11.3513
chr1	154520636	154520949	4.09893
chr1	154652399	154654185	14.2238
chr1	154727328	154728553	10.2069
chr1	154940846	154941568	5.72021
chr1	155051420	155053051	28.1894
chr1	155230802	155232576	13.8593
chr1	155598283	155599953	10.7828
chr1	155663229	155664572	9.11184
chr1	155693126	155695056	21.0538
chr1	155699031	155700791	21.9773
chr1	155878312	155878512	3.8313
chr1	155952671	155953765	5.61329
chr1	155983733	155985233	12.3321
chr1	156019509	156020460	6.11999
chr1	156041399	156042258	3.82043
chr1	156485628	156487280	20.506
chr1	156522686	156524070	6.80684
chr1	156703723	156704558	5.95651
chr1	156799779	156800185	3.99478
chr1	156846986	156848028	4.38945
chr1	156901970	156903189	9.68191
chr1	156949139	156950664	10.7828
chr1	157149439	157151815	22.3042
chr1	157217838	157218301	3.99478
chr1	157239312	157239581	3.50435
chr1	157267485	157268382	6.11999
chr1	157384251	157384688	4.15826
chr1	157466649	157467855	10.6221
chr1	158064525	158064956	5.13912
chr1	158156355	158157531	7.48248
chr1	158222284	158224246	15.9574
chr1	158243841	158244644	6.61042
chr1	158378889	158380228	11.0243
chr1	158502169	158503065	6.7739
chr1	159092148	159093239	6.54884
chr1	159151895	159152957	8.24519
chr1	159306620	159308822	14.7476
chr1	159983446	159984472	7.42781
chr1	160014251	160014868	5.46608
chr1	160024811	160026622	21.7473
chr1	160062762	160064084	10.0434
chr1	160079566	160080851	16.746
chr1	160154938	160156309	9.66883
chr1	160230684	160231146	4.64869
chr1	160240185	160241666	14.4395
chr1	160246987	160247306	3.26344
chr1	160247548	160247980	3.01392
chr1	160431303	160432396	11.1878
chr1	160436638	160438729	22.0127
chr1	160535068	160535814	4.97565
chr1	160810192	160810763	4.23818
chr1	160957746	160957946	3.01392
chr1	161089400	161090369	3.02727
chr1	161583867	161584816	9.38954
chr1	161875106	161875336	3.60455
chr1	161875603	161875868	3.17344
chr1	161889944	161891445	13.1495
chr1	162183435	162184390	3.92243
chr1	162448115	162449010	9.56318
chr1	162620110	162620500	4.15826
chr1	162708213	162710428	23.1425
chr1	163091310	163091710	3.8313
chr1	163310035	163311752	21.0189
chr1	163426655	163427467	6.7739
chr1	163670915	163671892	3.95968
chr1	163805580	163807135	13.3714
chr1	163841647	163842580	7.42246
chr1	163848468	163850030	13.9669
chr1	163854317	163855513	8.8991
chr1	163955597	163955827	3.34087
chr1	164026567	164027590	8.08172
chr1	164176177	164176412	3.27182
chr1	164314625	164315647	10.2069
chr1	164334532	164335324	5.79303
chr1	164441689	164445321	28.8434
chr1	164734082	164734759	4.81217
chr1	164856928	164858481	11.7706
chr1	165015251	165016522	17.8904
chr1	165437241	165438759	6.99275
chr1	165601363	165603155	14.9628
chr1	165641489	165642013	6.01031
chr1	165642131	165642616	7.30162
chr1	165645166	165645596	3.5396
chr1	165688253	165688603	3.82043
chr1	165866617	165868636	20.9562
chr1	165895592	165896814	11.1878
chr1	165935236	165935707	4.48521
chr1	166237943	166238811	3.76389
chr1	166280588	166280838	3.99478
chr1	166305174	166305994	7.10085
chr1	166710051	166712193	25.9718
chr1	166958452	166958959	3.8313
chr1	167177480	167178374	5.13912
chr1	167182541	167183179	3.82043
chr1	167195322	167196905	18.1629
chr1	167352156	167352739	4.66759
chr1	167462127	167462893	4.46013
chr1	167618413	167619195	9.06258
chr1	167788611	167789940	9.10171
chr1	167850313	167850882	4.81217
chr1	167902323	167903186	10.3704
chr1	167997710	167999250	11.0243
chr1	168100524	168102786	27.0451
chr1	168157111	168160397	40.5818
chr1	168222356	168223564	8.8991
chr1	168460621	168461413	5.62956
chr1	168520486	168524107	35.9866
chr1	168728959	168730756	17.7269
chr1	168782458	168783965	12.3145
chr1	168968392	168969067	7.10085
chr1	169330245	169331745	7.5932
chr1	169367877	169368964	13.64
chr1	169396924	169397828	6.44694
chr1	170078914	170079993	7.42781
chr1	170334012	170335022	6.7739
chr1	170434150	170435279	11.7575
chr1	170440147	170441548	12.5627
chr1	170578022	170580056	25.3472
chr1	170646311	170647452	7.91824
chr1	170775559	170776329	3.1837
chr1	170794382	170795428	7.75476
chr1	170816043	170818532	32.5054
chr1	170828662	170830196	13.8462
chr1	170898040	170899175	14.2939
chr1	170900793	170901201	3.66783
chr1	170932504	170933017	3.99478
chr1	171002423	171004151	34.5651
chr1	171013284	171014513	13.313
chr1	171037005	171037205	3.39942
chr1	171037828	171040945	21.3472
chr1	171102807	171103188	4.48521
chr1	171160357	171162167	13.2665
chr1	171170770	171171827	8.27635
chr1	171226339	171227760	16.9924
chr1	171265308	171265632	4.64869
chr1	171468459	171469982	19.5251
chr1	171585195	171585712	4.81217
chr1	172100241	172101542	18.5443
chr1	172126720	172130450	39.3059
chr1	172137301	172139091	12.2348
chr1	172173835	172177059	31.3813
chr1	172211586	172212919	10.6519
chr1	172360592	172362138	14.9037
chr1	172482901	172483669	5.14001
chr1	172567519	172569409	23.1216
chr1	172575782	172576363	5.3026
chr1	172850879	172852126	17.5634
chr1	173370537	173372177	19.5251
chr1	173412724	173413252	3.99478
chr1	173531234	173533522	32.1129
chr1	173602010	173602492	3.99478
chr1	174095863	174096957	9.06258
chr1	174214906	174215364	3.1837
chr1	174418275	174418693	3.8313
chr1	174507999	174508551	3.50435
chr1	174552852	174553682	5.07366
chr1	174573924	174575161	7.60585
chr1	175527088	175527879	5.13912
chr1	175593134	175594042	8.24519
chr1	175614951	175615917	5.57516
chr1	176028965	176029486	3.06766
chr1	176031542	176032174	4.15826
chr1	176080535	176082147	16.4191
chr1	176434958	176435811	6.11999
chr1	176658780	176660119	9.52958
chr1	176886554	176886754	3.50435
chr1	176887011	176888156	9.38954
chr1	176976691	176978853	22.9208
chr1	177024269	177025991	19.2098
chr1	177050014	177050739	5.62956
chr1	177077847	177079974	23.6121
chr1	177104972	177105231	4.64869
chr1	177110241	177111915	24.2865
chr1	177191559	177193064	13.4765
chr1	177335904	177336559	4.304
chr1	177355192	177356858	18.1629
chr1	177418590	177418827	3.07552
chr1	177445760	177446059	3.01392
chr1	177881503	177882331	13.4765
chr1	177945452	177946570	7.02313
chr1	177973257	177973638	3.50435
chr1	178113035	178113866	15.4382
chr1	178318908	178319920	3.09382
chr1	178326857	178328488	8.13711
chr1	178328966	178329342	3.34087
chr1	178333840	178338494	6.75561
chr1	178423936	178425287	11.8417
chr1	178545316	178546239	6.93738
chr1	178577457	178578355	4.79517
chr1	178639628	178640091	4.23818
chr1	179025293	179025829	3.41577
chr1	179071585	179072123	5.62956
chr1	179185157	179186155	7.59129
chr1	179672149	179672651	4.20227
chr1	179704248	179704812	4.64869
chr1	179802377	179802722	4.51667
chr1	179860813	179861636	4.22082
chr1	179931300	179931889	4.32174
chr1	179978071	179979622	13.313
chr1	180107082	180107359	3.8313
chr1	180109966	180111002	8.73563
chr1	180121384	180121893	3.54194
chr1	180125073	180126013	7.42781
chr1	180132309	180134374	25.7373
chr1	180238374	180238962	3.1837
chr1	180244633	180245808	6.11061
chr1	180321481	180322996	13.707
chr1	180402792	180403371	4.12836
chr1	180445080	180445868	7.10085
chr1	180454368	180455535	14.2939
chr1	180808681	180808881	3.01392
chr1	180810869	180811352	3.40269
chr1	180811470	180812107	5.46608
chr1	180812662	180813482	4.65592
chr1	180813862	180814177	3.1837
chr1	181436752	181437575	6.28347
chr1	181449540	181450316	9.22606
chr1	181728219	181729208	6.46614
chr1	181826455	181827406	7.15468
chr1	182018370	182018744	4.65787
chr1	182554145	182555772	12.036
chr1	182939956	182940580	4.11201
chr1	182983188	182983407	4.34409
chr1	183123376	183123681	3.55022
chr1	183172586	183174082	10.9951
chr1	183175196	183175804	4.48521
chr1	183179517	183180607	9.38954
chr1	183218543	183219365	6.61042
chr1	183275692	183275921	3.26344
chr1	183399634	183400201	6.11999
chr1	183577397	183578807	15.9286
chr1	184005348	184005986	5.41409
chr1	184110342	184111599	8.05736
chr1	184311862	184312756	7.91824
chr1	184324734	184325756	7.10085
chr1	184357859	184358551	4.84992
chr1	184743448	184744237	3.51916
chr1	185014677	185015754	8.55485
chr1	185266081	185268231	21.8138
chr1	185789119	185790263	8.1734
chr1	186919020	186919776	8.08172
chr1	186967479	186968758	5.71276
chr1	187029616	187030773	6.78092
chr1	187262083	187262483	3.8313
chr1	187340624	187341512	4.81217
chr1	187436703	187437416	4.81217
chr1	187529226	187529751	3.99478
chr1	187562855	187563154	3.99478
chr1	187577566	187577766	3.17739
chr1	187597328	187598246	7.10085
chr1	187900421	187900732	3.8313
chr1	188083631	188084640	11.6782
chr1	188202932	188203522	3.99478
chr1	188243035	188243617	4.51667
chr1	188301728	188302958	16.5825
chr1	188799637	188800499	10.0434
chr1	188969885	188970282	3.8313
chr1	188992268	188992840	3.82043
chr1	189028626	189029664	5.90915
chr1	189052868	189054120	11.3513
chr1	189064404	189064751	3.34087
chr1	189210059	189210661	5.3026
chr1	189362573	189362978	4.51667
chr1	189744434	189745254	3.53181
chr1	189794363	189794787	3.99478
chr1	189993756	189994836	5.3026
chr1	190126996	190127505	4.48521
chr1	190590657	190591927	7.42781
chr1	190770233	190771033	5.7699
chr1	190896048	190897412	17.3999
chr1	191223294	191223801	3.15064
chr1	191237267	191238257	7.91824
chr1	191529680	191530394	5.90915
chr1	191573862	191575482	6.22529
chr1	191656793	191658015	14.1304
chr1	191718912	191719377	3.53356
chr1	191719482	191719815	3.1837
chr1	191821885	191822441	5.54798
chr1	191907557	191907857	3.52458
chr1	191968020	191969027	5.63065
chr1	192135464	192136596	6.50289
chr1	192216095	192216526	4.97565
chr1	192440062	192441134	12.6591
chr1	192699660	192700473	5.79303
chr1	192817075	192817731	4.15826
chr1	192905666	192906860	6.28347
chr1	192935861	192937535	17.2245
chr1	192938686	192939665	3.87993
chr1	193101212	193101741	5.7699
chr1	193517723	193519029	8.86963
chr1	193753244	193754869	15.2747
chr1	193936906	193937106	3.50435
chr1	194034506	194036170	10.942
chr1	194103540	194104364	7.85861
chr1	194455422	194456400	6.28347
chr1	194505244	194507306	28.3529
chr1	194517351	194517715	3.01392
chr1	194639318	194642184	32.7668
chr1	194815777	194816069	3.34087
chr1	194839436	194840782	11.5147
chr10	3213945	3215278	10.5339
chr10	3450092	3450556	3.50435
chr10	4267269	4267517	3.39199
chr10	4267750	4268361	4.64869
chr10	4309009	4309809	3.53181
chr10	4387962	4388604	3.40269
chr10	4432819	4433203	3.42172
chr10	4701169	4701825	3.95968
chr10	4928313	4929117	5.95651
chr10	5239705	5240485	6.93738
chr10	5605641	5605842	3.39199
chr10	5632989	5633661	5.79303
chr10	5704247	5705176	5.15637
chr10	7596656	7597724	7.47716
chr10	7599525	7600528	4.51667
chr10	7605474	7605714	3.99478
chr10	7799280	7799780	3.99478
chr10	7975367	7975903	3.54194
chr10	8143858	8144425	4.48521
chr10	8859098	8859503	4.64869
chr10	8883835	8884355	4.97435
chr10	9049690	9050133	3.66783
chr10	9257463	9258385	4.65592
chr10	9596441	9596984	7.42781
chr10	9599920	9601083	9.22606
chr10	9639988	9640807	6.60538
chr10	9785054	9785737	3.8313
chr10	9797839	9798058	3.39587
chr10	9806169	9806397	3.01392
chr10	9858597	9859034	3.99478
chr10	10524912	10526091	8.55485
chr10	10658735	10659085	3.66783
chr10	11019908	11020239	3.17739
chr10	11571703	11572084	3.8313
chr10	12043199	12043903	4.93441
chr10	12156084	12156678	5.62956
chr10	12446517	12448073	13.3854
chr10	12852260	12853245	5.7293
chr10	12937756	12938229	3.34087
chr10	12952222	12953704	18.5443
chr10	13390480	13391442	4.34409
chr10	13539031	13540145	4.81217
chr10	13679777	13680755	6.39847
chr10	13693204	13694082	4.91706
chr10	14436055	14437070	6.04839
chr10	14519659	14520950	7.99786
chr10	15014762	15015197	4.32174
chr10	15681093	15681439	3.06766
chr10	16140645	16141363	4.97565
chr10	16211121	16211912	6.61042
chr10	16217514	16218413	6.7739
chr10	16578296	16579372	4.22805
chr10	16750770	16751681	4.8246
chr10	17519783	17520771	4.97565
chr10	17723722	17726078	10.4942
chr10	17927255	17927751	3.8313
chr10	18198401	18198886	3.54194
chr10	18571061	18572547	8.55485
chr10	18831525	18831787	3.66783
chr10	18905944	18906658	4.48521
chr10	19337585	19338343	4.81759
chr10	19415022	19415973	5.57516
chr10	19606440	19607051	4.81217
chr10	19814180	19814693	4.09893
chr10	19822762	19823783	5.8526
chr10	19910039	19910903	5.63065
chr10	20149989	20150225	3.15064
chr10	20233795	20234513	6.61042
chr10	20311371	20311871	3.53181
chr10	20312901	20314197	3.28286
chr10	20374084	20375410	11.0243
chr10	20734285	20735433	7.42781
chr10	20816699	20817682	9.38954
chr10	20849710	20850559	5.90915
chr10	20979181	20979830	8.8991
chr10	20987164	20987563	3.50435
chr10	20990238	20990655	4.81217
chr10	20994859	20995452	4.79517
chr10	21041760	21042809	8.99603
chr10	21311310	21311725	6.7739
chr10	21332808	21334472	20.9964
chr10	21363839	21364039	3.50435
chr10	21364207	21365271	9.52958
chr10	21453251	21453967	3.99478
chr10	21480554	21480909	4.15826
chr10	21593122	21593579	6.7739
chr10	21596146	21597303	9.4915
chr10	21614426	21614737	3.66783
chr10	22167580	22168067	3.1242
chr10	22783568	22784572	7.10085
chr10	22810574	22810921	3.66783
chr10	22816536	22817327	4.32174
chr10	22817579	22818627	4.48521
chr10	23135968	23136221	3.99478
chr10	23218076	23218786	5.21291
chr10	23493481	23493998	7.10085
chr10	23685403	23686200	6.61042
chr10	23705432	23706873	7.12904
chr10	24342441	24342823	3.99478
chr10	24479765	24480193	3.99478
chr10	24596783	24597188	4.32174
chr10	25362383	25362691	3.19802
chr10	25657167	25657915	6.44694
chr10	25658568	25659347	5.79303
chr10	25954882	25956162	15.5043
chr10	26552821	26554544	20.506
chr10	26935248	26936520	9.71649
chr10	27014779	27015430	4.22805
chr10	27395946	27396703	6.11999
chr10	27536486	27537452	7.42781
chr10	27567658	27568999	9.71649
chr10	27570630	27571718	8.08172
chr10	27854259	27854552	3.01392
chr10	27927851	27928445	5.13912
chr10	28141245	28142275	5.21214
chr10	28392851	28393393	3.8313
chr10	28404453	28404671	3.39587
chr10	28439109	28439540	3.1242
chr10	28464780	28465513	5.79303
chr10	28738765	28740438	15.6017
chr10	29136980	29137261	3.66783
chr10	29263779	29265180	12.8226
chr10	29390798	29391573	5.13912
chr10	29453949	29454359	3.66783
chr10	29791300	29791847	4.48521
chr10	30521999	30522427	3.54447
chr10	30529586	30530728	4.99866
chr10	30551152	30551943	5.62956
chr10	30682372	30684368	20.4814
chr10	30747315	30748348	5.46608
chr10	30780572	30781723	7.78519
chr10	30805623	30806392	3.68119
chr10	31024820	31026352	13.5815
chr10	31619025	31619749	4.97565
chr10	32253059	32254461	10.3651
chr10	32496066	32496839	6.28347
chr10	32777936	32778937	3.12814
chr10	32945358	32945856	4.81217
chr10	33442061	33443260	7.42781
chr10	33527138	33528477	8.73563
chr10	33627792	33629359	9.68191
chr10	33929782	33930633	4.15826
chr10	33938944	33939548	4.15826
chr10	34534392	34535166	3.99478
chr10	35346189	35347085	9.87997
chr10	35606712	35608212	15.7652
chr10	35623795	35625148	7.71936
chr10	36325182	36325382	3.50435
chr10	36615913	36616515	5.13912
chr10	36616630	36616830	3.34087
chr10	36909119	36910025	4.51667
chr10	37134960	37135160	3.50435
chr10	37135657	37137170	7.42781
chr10	37243465	37243717	3.8313
chr10	37278388	37279252	6.7739
chr10	38566455	38566872	4.32174
chr10	38587995	38589794	7.90093
chr10	38651924	38652743	7.59129
chr10	38788218	38788963	3.87993
chr10	39120191	39120453	3.26344
chr10	39135134	39136577	12.8715
chr10	39324365	39325219	6.54884
chr10	39341439	39342572	7.75476
chr10	39400806	39402528	16.5271
chr10	39420756	39421675	4.81217
chr10	39422899	39423708	3.41577
chr10	39624587	39626133	21.6441
chr10	39636511	39637966	12.4956
chr10	39715240	39716421	11.479
chr10	39744411	39746113	7.89595
chr10	39818103	39818769	4.37742
chr10	39856430	39857169	5.3026
chr10	39894474	39895774	13.6223
chr10	40221974	40223292	6.61911
chr10	40247056	40248039	6.4659
chr10	40267558	40268274	4.20906
chr10	40284814	40285853	10.2069
chr10	40288875	40290276	14.4573
chr10	40299666	40301820	4.39367
chr10	40304629	40306081	13.0837
chr10	40375495	40376505	7.44087
chr10	40430063	40430263	3.66783
chr10	40719129	40719336	3.34087
chr10	40758690	40759666	4.05646
chr10	41100821	41102334	9.49233
chr10	41235820	41237230	10.8291
chr10	41255056	41257046	23.6121
chr10	41286071	41286342	3.54194
chr10	41287349	41288265	5.79303
chr10	41359987	41361968	23.6121
chr10	41530512	41531252	5.62956
chr10	41629770	41630819	8.24519
chr10	41658883	41660148	10.0434
chr10	41707669	41708184	4.81217
chr10	41822383	41823465	6.32689
chr10	41867674	41868637	8.08172
chr10	41875862	41876640	4.32174
chr10	42048973	42049183	3.66783
chr10	42273618	42276951	7.5932
chr10	42502954	42503236	3.06766
chr10	42507189	42508509	9.66883
chr10	42810900	42812556	14.2074
chr10	43226427	43228042	22.9523
chr10	43243851	43245356	11.6782
chr10	43296169	43298559	32.4398
chr10	43354430	43355319	9.06258
chr10	43639781	43641270	10.9167
chr10	44331253	44331987	4.32174
chr10	44649664	44650195	4.48521
chr10	44978063	44978449	3.66783
chr10	45044888	45045406	3.95968
chr10	45128619	45129446	4.23818
chr10	45132931	45133516	4.7662
chr10	45305567	45306583	6.28347
chr10	45469326	45469581	3.17739
chr10	45470072	45470430	3.25437
chr10	45618971	45620022	9.90417
chr10	45631732	45632527	5.13912
chr10	46142349	46143844	12.986
chr10	46234478	46235497	4.69221
chr10	46677491	46679075	15.0034
chr10	46904814	46906211	10.3704
chr10	47808165	47809902	20.506
chr10	48381609	48382394	6.11999
chr10	48670687	48672036	7.44087
chr10	48721712	48723125	12.3321
chr10	49785789	49786478	4.15826
chr10	50639988	50640188	3.50435
chr10	50642941	50643141	3.17739
chr10	50682819	50684877	15.0197
chr10	50690075	50690917	7.59129
chr10	50735222	50735659	3.66783
chr10	50852574	50853290	6.39847
chr10	51395894	51397827	30.4781
chr10	51444078	51444331	3.23375
chr10	51565330	51566133	5.13912
chr10	51937702	51938792	8.8991
chr10	51959347	51961851	19.1982
chr10	51981388	51983298	18.2173
chr10	52018485	52020202	20.3909
chr10	52047665	52048473	5.46608
chr10	52064251	52065515	9.22606
chr10	52129437	52130258	4.34409
chr10	52273391	52274615	6.93738
chr10	52465363	52466395	8.28944
chr10	52537052	52537260	4.32174
chr10	52825151	52825673	4.48521
chr10	52912247	52913371	9.22606
chr10	53175040	53176439	20.8018
chr10	53268985	53269210	3.8313
chr10	53269334	53269562	3.8313
chr10	53528589	53529485	8.73563
chr10	53646025	53646453	3.50435
chr10	53850239	53851539	6.60933
chr10	53922726	53922995	3.40269
chr10	53970231	53971254	3.06766
chr10	54007640	54008483	5.3026
chr10	54357802	54359534	13.2791
chr10	54980784	54981632	5.7699
chr10	54981736	54982080	3.66783
chr10	55512331	55513965	12.986
chr10	55546991	55547292	4.15265
chr10	55698558	55700026	19.6886
chr10	55876600	55878064	7.30162
chr10	56115357	56115622	3.02171
chr10	56369484	56370613	4.30242
chr10	56566416	56568115	16.8764
chr10	56892558	56893507	8.23925
chr10	57221272	57221514	3.01392
chr10	57521505	57522815	10.3704
chr10	57612791	57613937	4.97565
chr10	57784086	57785784	18.0538
chr10	58254245	58255031	3.5396
chr10	58325953	58326212	3.50435
chr10	58358502	58360251	11.9789
chr10	58370482	58372081	15.2387
chr10	58408997	58409847	6.61042
chr10	58429109	58430716	19.6066
chr10	58495022	58495967	7.75476
chr10	58562890	58563099	3.50435
chr10	58564088	58565554	15.1113
chr10	58593534	58595193	15.915
chr10	58698601	58699295	4.48521
chr10	58799245	58800889	20.9964
chr10	59025531	59026585	6.7739
chr10	59091138	59092922	14.8835
chr10	59111341	59112241	10.3704
chr10	59157951	59159476	6.53197
chr10	59190315	59191708	7.63826
chr10	59222939	59223536	4.05417
chr10	59659079	59660810	12.6989
chr10	59709365	59710939	14.821
chr10	59726850	59727109	3.66783
chr10	59861455	59862295	6.18764
chr10	59949451	59951186	6.77466
chr10	60031785	60032318	4.22805
chr10	60274841	60275064	3.50435
chr10	60386290	60386490	3.34087
chr10	60618330	60620227	32.7668
chr10	60662284	60664007	21.6268
chr10	60696582	60697138	6.33759
chr10	60704217	60705140	7.91824
chr10	60845681	60847734	21.634
chr10	60875652	60876292	4.73397
chr10	60908539	60909706	5.3425
chr10	60959110	60959310	3.34087
chr10	60959421	60959752	3.99478
chr10	60965804	60967937	35.7707
chr10	61107256	61108081	4.74463
chr10	61239205	61240883	23.8514
chr10	61375988	61376957	5.43381
chr10	61508711	61509817	8.57215
chr10	61583409	61583876	4.81217
chr10	61656573	61657599	4.65592
chr10	61739797	61740849	15.1113
chr10	61839528	61840615	5.01652
chr10	62178853	62179535	6.12027
chr10	62354372	62355056	4.56351
chr10	62482872	62483094	3.50435
chr10	62486093	62486414	3.26344
chr10	62649832	62650117	3.40269
chr10	62747123	62747445	3.25437
chr10	62759906	62762750	32.2764
chr10	62769490	62771013	10.2069
chr10	62790833	62791964	4.12136
chr10	62935352	62936409	5.92376
chr10	62993396	62993764	3.40269
chr10	63022072	63023328	4.93353
chr10	63298797	63300090	11.4392
chr10	63324908	63327154	32.9303
chr10	63327305	63327553	3.95968
chr10	63332820	63334406	18.3808
chr10	64025817	64027228	11.8968
chr10	64049805	64050632	6.44694
chr10	64082371	64083176	6.61042
chr10	64236997	64239147	31.132
chr10	64367198	64369635	20.3425
chr10	64456914	64458372	12.4956
chr10	64468093	64470143	13.5112
chr10	64491603	64494195	34.3156
chr10	64832404	64833540	7.10085
chr10	64970923	64972301	11.6782
chr10	65926465	65928499	25.7373
chr10	66238922	66240160	14.4573
chr10	66284247	66285317	4.22082
chr10	66353124	66354221	7.44087
chr10	66551842	66553427	19.5251
chr10	66597662	66598936	10.3704
chr10	66612411	66613885	13.1495
chr10	67186781	67187072	3.07552
chr10	67231790	67233424	20.0156
chr10	67255187	67255723	5.13912
chr10	67259192	67259955	3.68119
chr10	67294590	67296785	10.6974
chr10	67458459	67459358	6.18764
chr10	67464445	67465434	5.38845
chr10	67583831	67585088	17.2365
chr10	67683850	67684967	4.30242
chr10	67787130	67788136	5.79303
chr10	67813369	67813863	3.66783
chr10	67862254	67862820	4.34409
chr10	67977040	67979322	25.0834
chr10	68116302	68117902	17.6059
chr10	68192048	68192923	6.7739
chr10	68285091	68286427	13.4765
chr10	68304067	68304367	3.66783
chr10	68408313	68409159	4.81217
chr10	68419960	68421198	15.6017
chr10	68821192	68822631	11.1878
chr10	68842940	68844019	10.5126
chr10	68881548	68882199	4.00129
chr10	68966865	68967988	6.54884
chr10	69157395	69158521	5.6662
chr10	69227472	69229083	17.3999
chr10	69359740	69360472	8.18605
chr10	69636909	69637769	9.71649
chr10	69942347	69943484	7.58012
chr10	69986755	69987266	4.45536
chr10	70455208	70455831	4.15826
chr10	70610905	70611520	4.48521
chr10	70743606	70744041	4.48521
chr10	70902559	70903767	12.1686
chr10	70930540	70931157	5.13912
chr10	71228783	71229004	4.15826
chr10	71381612	71381812	3.01392
chr10	71482452	71483175	6.32689
chr10	71617154	71617727	5.13912
chr10	71758014	71759127	7.47716
chr10	71782952	71783232	4.64869
chr10	71893286	71893818	3.8313
chr10	72262130	72262447	3.8313
chr10	73079602	73080139	5.46608
chr10	73157845	73159903	17.3999
chr10	73330025	73330834	6.61042
chr10	73517770	73519360	10.8848
chr10	74239866	74240179	3.1242
chr10	74479230	74480271	9.87997
chr10	74849853	74851039	9.06258
chr10	75002122	75003193	10.2069
chr10	75507323	75508055	6.28347
chr10	75594241	75595217	7.91824
chr10	75653486	75654863	12.1578
chr10	75679949	75682644	30.8713
chr10	75745898	75747461	22.3042
chr10	75847821	75849398	23.939
chr10	75859214	75859795	3.54447
chr10	75859945	75860202	4.23818
chr10	75910045	75911706	12.1686
chr10	75937383	75937733	4.09893
chr10	76075620	76075838	3.1242
chr10	76495473	76496695	7.82528
chr10	76670175	76672290	36.3257
chr10	76874225	76876449	29.7318
chr10	76908870	76910727	15.2387
chr10	77092525	77093805	15.2747
chr10	77278387	77278975	4.64869
chr10	77371591	77372524	6.04839
chr10	77489306	77490424	5.11598
chr10	77561521	77562300	3.86728
chr10	77611736	77613781	27.7281
chr10	77747947	77748172	3.8313
chr10	77849949	77850693	3.76389
chr10	78079219	78079985	4.65592
chr10	78165510	78167240	21.8277
chr10	78203436	78206302	38.1616
chr10	78221396	78221969	4.64751
chr10	78250492	78251093	4.81217
chr10	78323498	78324639	11.0613
chr10	78365444	78366191	6.28347
chr10	78440749	78442314	28.0495
chr10	78513275	78514450	6.78092
chr10	79071623	79071833	3.54194
chr10	79228327	79229453	6.18764
chr10	79577452	79577960	3.8313
chr10	79708856	79710230	9.92477
chr10	79854729	79856162	7.02193
chr10	79963388	79964607	15.1995
chr10	79967391	79967613	3.61597
chr10	79983859	79984091	3.0935
chr10	80023316	80024647	23.1758
chr10	80114712	80115140	3.26344
chr10	80149683	80152268	6.04839
chr10	80172867	80173237	4.74463
chr10	80265003	80265230	3.21869
chr10	80292533	80293462	6.58644
chr10	80378174	80378972	5.87039
chr10	80385768	80386613	3.95968
chr10	80706278	80709197	33.7021
chr10	80731353	80731817	4.23818
chr10	80797589	80797826	3.29973
chr10	80807089	80807331	3.11804
chr10	80818166	80818396	3.34087
chr10	80826884	80828060	4.22805
chr10	80865524	80865869	3.66783
chr10	80930457	80930695	3.26344
chr10	80930813	80932103	4.01372
chr10	81176686	81177997	7.1744
chr10	81393972	81394336	3.88435
chr10	81402045	81402304	3.54194
chr10	81420909	81421134	3.17548
chr10	81560162	81560388	3.13793
chr10	82022078	82022454	5.62956
chr10	82656885	82657672	8.57215
chr10	82705136	82707617	27.6128
chr10	82866957	82867169	3.31623
chr10	83048834	83050667	19.3617
chr10	83246220	83247261	10.5339
chr10	83442475	83444312	23.7328
chr10	84314619	84315820	7.33112
chr10	84373934	84374796	5.46608
chr10	84568664	84569815	4.67533
chr10	84719983	84720663	6.11999
chr10	84845490	84846919	17.3999
chr10	84982895	84983225	3.34087
chr10	85124439	85124719	3.55616
chr10	85188899	85190215	15.7652
chr10	85435922	85437319	9.71649
chr10	85438640	85439081	3.50435
chr10	85520080	85521181	12.6591
chr10	85544154	85545252	12.1753
chr10	85744493	85745058	4.97565
chr10	85915221	85915527	3.61
chr10	85917043	85917666	3.42512
chr10	85931905	85932907	8.40867
chr10	85951855	85953811	14.1368
chr10	85956997	85957341	3.8313
chr10	85957574	85957934	4.48521
chr10	86026373	86027190	4.51667
chr10	86062774	86064285	10.7828
chr10	86116351	86116846	4.32174
chr10	86192173	86194197	28.1322
chr10	86247732	86249773	23.2851
chr10	86378121	86379009	7.98082
chr10	86478348	86478868	4.84228
chr10	86497106	86498018	10.2069
chr10	86704681	86705046	3.10525
chr10	86726384	86727833	13.8034
chr10	86733604	86734455	5.04033
chr10	86781282	86782251	6.20072
chr10	86791003	86792710	11.3513
chr10	86822446	86822686	3.10932
chr10	86997341	86998215	7.26433
chr10	87085929	87087645	20.165
chr10	87093468	87095032	9.19394
chr10	87349935	87350977	9.06258
chr10	87557490	87558040	4.97435
chr10	88134699	88135362	4.81217
chr10	88176435	88177524	6.89696
chr10	88194539	88195348	4.80825
chr10	88681125	88681538	5.3026
chr10	89162849	89164202	9.55301
chr10	89190843	89191596	5.13912
chr10	89247651	89248804	8.08172
chr10	89509062	89510116	3.88857
chr10	89592941	89594267	6.93738
chr10	89682635	89683640	7.59129
chr10	90373538	90374333	6.04839
chr10	90380249	90380777	4.81217
chr10	90544711	90545667	6.28347
chr10	90691727	90693342	23.2851
chr10	90706259	90707179	5.96892
chr10	90962398	90963482	9.68191
chr10	90963580	90963780	3.50435
chr10	91094353	91095443	5.75837
chr10	91107828	91108943	10.0866
chr10	91122882	91123178	3.10932
chr10	91181961	91182267	4.03274
chr10	91220577	91220945	3.06766
chr10	91382826	91383774	6.93738
chr10	91440007	91441316	13.1495
chr10	91447230	91448817	9.06258
chr10	91616406	91617286	5.90915
chr10	91651919	91652776	5.62956
chr10	91837901	91838782	6.28347
chr10	91996451	91997972	9.22606
chr10	92000289	92001820	13.7433
chr10	92345781	92346490	7.59129
chr10	92374497	92375036	4.48521
chr10	92534912	92536152	13.6881
chr10	92576039	92577618	18.8592
chr10	92645649	92648444	29.4973
chr10	92679327	92682751	38.325
chr10	92830226	92830426	3.34087
chr10	93408820	93409542	6.28347
chr10	93450895	93452388	13.9938
chr10	93473158	93474571	9.00203
chr10	93579998	93581176	10.3618
chr10	93743933	93744231	4.15826
chr10	93744344	93746307	25.8215
chr10	93746637	93746891	3.99478
chr10	93934383	93935619	11.5147
chr10	93953644	93956311	34.0746
chr10	93970963	93972126	9.87997
chr10	94501863	94502642	4.48521
chr10	94677580	94679406	15.5172
chr10	94688037	94688357	3.52458
chr10	94689261	94689490	3.48709
chr10	95373863	95375496	16.0187
chr10	95530452	95531783	14.4573
chr10	95557712	95557947	3.50435
chr10	95561281	95561498	3.64976
chr10	95562231	95562652	3.22619
chr10	95600759	95602044	10.7698
chr10	96003583	96004569	8.24519
chr10	96124283	96125022	4.11201
chr10	96221520	96222064	4.32174
chr10	96575121	96575584	4.23818
chr10	96617585	96618980	8.32834
chr10	96619591	96620654	4.70061
chr10	96620864	96621082	3.43888
chr10	97804226	97805660	15.4382
chr10	98619589	98620298	3.82043
chr10	98761438	98761793	3.06766
chr10	99001350	99003074	11.4225
chr10	99023828	99024911	8.40867
chr10	99264545	99266033	4.99496
chr10	99266260	99266682	3.41577
chr10	99422619	99423169	4.97565
chr10	99967089	99968272	6.28347
chr10	100017359	100017593	3.66783
chr10	100639223	100640482	13.8034
chr10	100846905	100847308	4.32174
chr10	101235288	101236515	7.26433
chr10	101637250	101639140	10.7853
chr10	101912308	101913176	6.61042
chr10	102033410	102034474	5.79303
chr10	102886944	102888459	10.3704
chr10	103369218	103370271	4.41974
chr10	103435629	103436316	4.48521
chr10	104289461	104290318	3.68119
chr10	104671423	104672176	5.13912
chr10	105212153	105212777	5.95651
chr10	105488567	105489132	6.93738
chr10	105694124	105695742	11.2005
chr10	106029982	106030381	3.17739
chr10	106482772	106483842	5.3026
chr10	106725763	106727167	12.0052
chr10	106960492	106961400	7.42781
chr10	107148179	107148508	3.54194
chr10	107337019	107338080	5.7699
chr10	107481849	107482060	3.66783
chr10	107482232	107482537	4.32174
chr10	107778703	107779411	4.48521
chr10	108261403	108262098	3.4111
chr10	109154429	109155330	6.61042
chr10	109489084	109489382	3.34087
chr10	109848349	109849261	7.17976
chr10	109887566	109888819	13.9669
chr10	110273881	110274343	3.90841
chr10	110398269	110398724	4.69221
chr10	110994737	110995002	3.66783
chr10	111047926	111049002	10.0434
chr10	111306581	111306790	3.23375
chr10	111545190	111546481	11.5147
chr10	111612430	111613168	4.57617
chr10	111823733	111824234	5.46608
chr10	111977089	111977927	4.18137
chr10	112347688	112348513	3.99478
chr10	112752581	112752925	4.32174
chr10	112879574	112880643	7.75476
chr10	112928240	112928687	4.2814
chr10	114224015	114225627	10.9221
chr10	114589210	114590021	8.08172
chr10	115015608	115016396	7.75476
chr10	115057516	115058574	6.28347
chr10	115380187	115380618	4.48521
chr10	115385994	115386291	3.50435
chr10	115813496	115814519	8.24519
chr10	115870698	115871837	8.24519
chr10	116051412	116051860	4.15826
chr10	116052011	116053238	20.506
chr10	116129222	116130342	6.32689
chr10	116377370	116378326	7.59129
chr10	116480715	116481089	3.82043
chr10	116495738	116496149	4.45536
chr10	117123549	117124415	8.57215
chr10	117293485	117293866	3.54194
chr10	117376705	117376948	3.8313
chr10	117523394	117523614	3.50435
chr10	117854845	117855558	4.32174
chr10	117962303	117962589	4.23818
chr10	118006635	118006910	3.17739
chr10	118907931	118909015	11.6672
chr10	119238626	119239533	4.53006
chr10	120586940	120587660	3.53181
chr10	120614961	120615597	6.28347
chr10	120925817	120926094	3.8313
chr10	120977871	120978181	3.54194
chr10	121237292	121238186	6.11999
chr10	122658901	122660421	13.9669
chr10	122803881	122804109	3.8313
chr10	122863691	122863938	4.23818
chr10	122885987	122887056	6.60538
chr10	123913417	123913648	3.50435
chr10	125556898	125557992	3.65081
chr10	126353529	126354164	5.21291
chr10	126906025	126906681	5.62956
chr10	127253221	127254286	7.59129
chr10	127290915	127291874	4.12467
chr10	127353716	127354026	3.1837
chr10	127470777	127472022	7.71936
chr10	127625789	127627398	6.66488
chr10	127824990	127826379	13.64
chr10	127828573	127830276	8.63755
chr10	128036184	128037165	4.70487
chr10	128059369	128060309	5.89766
chr10	128060811	128061034	3.40269
chr10	128068914	128069464	3.66783
chr10	128083699	128084666	5.7293
chr10	128090508	128090734	3.34087
chr10	128092958	128093474	3.69858
chr10	128096713	128097524	6.31676
chr10	128305106	128305829	4.22805
chr10	128455041	128456738	13.1631
chr10	128547519	128549199	7.12366
chr10	128564862	128565207	3.26344
chr10	128572026	128572608	3.82043
chr10	128704183	128704401	3.01392
chr10	128868054	128868928	8.73563
chr10	128875459	128876823	12.1686
chr10	128950767	128951457	4.80825
chr10	129106640	129107776	5.61329
chr10	129256442	129257232	7.10085
chr10	129482801	129483642	3.1837
chr10	129673647	129676276	31.459
chr10	130141760	130143037	10.2069
chr10	130293683	130294537	8.08172
chr10	130315130	130316102	5.27241
chr10	130542250	130545246	47.3163
chr11	3130599	3131109	3.27226
chr11	3132776	3134208	6.96599
chr11	3292824	3293754	6.42298
chr11	3463702	3464227	4.22082
chr11	3648002	3648544	4.304
chr11	3681136	3683382	17.3274
chr11	3879793	3881057	9.63655
chr11	3899467	3900959	16.9097
chr11	4108660	4109072	3.68119
chr11	4160510	4160972	3.42512
chr11	4313392	4314111	3.99478
chr11	4543379	4544360	7.26433
chr11	4660813	4661134	4.09893
chr11	4701824	4702061	4.51667
chr11	4749788	4750415	4.09893
chr11	4973030	4974170	9.5242
chr11	5041133	5042629	14.785
chr11	5061621	5061927	3.13658
chr11	5062875	5063185	3.66637
chr11	5063431	5064381	3.7953
chr11	5084895	5085095	3.26344
chr11	5097776	5098710	5.61329
chr11	5321158	5322022	3.8313
chr11	5397882	5399072	10.2069
chr11	5529448	5529710	3.99478
chr11	5545097	5546032	4.71705
chr11	5561433	5562348	5.94965
chr11	5566511	5567423	8.24519
chr11	5680111	5681340	9.25109
chr11	6108830	6109844	6.7739
chr11	6156198	6157842	20.833
chr11	6181799	6183694	19.8744
chr11	6213687	6214811	9.06258
chr11	6415824	6417276	6.32689
chr11	6463707	6465296	12.1187
chr11	6474333	6475575	3.69322
chr11	6586678	6587170	3.50435
chr11	6603611	6604002	4.41929
chr11	6644510	6645294	5.81576
chr11	6686518	6687421	6.4328
chr11	6695781	6696195	3.66783
chr11	6770755	6771419	4.97565
chr11	6810915	6811831	7.30416
chr11	7109275	7110397	6.93738
chr11	7316903	7317824	6.74463
chr11	7502266	7502466	3.34087
chr11	7665894	7667186	9.22606
chr11	8006934	8008254	9.38954
chr11	8464389	8465653	15.4382
chr11	8480579	8482114	8.8991
chr11	8540693	8541222	3.50435
chr11	8656406	8658125	20.3702
chr11	8932822	8934186	9.10171
chr11	9058477	9059452	7.10085
chr11	9259486	9260935	10.3704
chr11	9788056	9789114	3.29973
chr11	10407323	10408640	9.87965
chr11	11065444	11065920	5.13912
chr11	11117045	11117958	4.97565
chr11	11487538	11488555	8.73563
chr11	11559982	11561372	11.2005
chr11	11677345	11677545	3.99478
chr11	11808374	11808691	3.80739
chr11	11825216	11825884	3.50435
chr11	12016074	12016306	3.8313
chr11	12526320	12527906	19.5251
chr11	12607172	12607927	4.64869
chr11	13431424	13433569	22.6312
chr11	14149831	14150581	6.44694
chr11	14315182	14316421	7.42781
chr11	14420018	14420822	3.54194
chr11	14612521	14613519	17.8904
chr11	14633386	14634467	9.38954
chr11	14809042	14809609	5.13912
chr11	15011011	15011915	5.62956
chr11	15375716	15377319	7.91824
chr11	15486103	15487396	7.59129
chr11	16315649	16316730	10.3704
chr11	16966505	16967079	4.09893
chr11	17270079	17271067	5.62956
chr11	17306223	17306631	3.34087
chr11	17400411	17400865	5.13912
chr11	17425112	17425497	3.66783
chr11	17463383	17464126	4.09893
chr11	17642954	17643204	3.50435
chr11	18277914	18279289	11.3513
chr11	18541509	18542424	6.11999
chr11	18576897	18578063	11.1878
chr11	18582451	18583738	16.2556
chr11	18745640	18746189	4.64869
chr11	19004896	19006066	8.8991
chr11	19014489	19014914	3.34003
chr11	19258709	19259414	7.26433
chr11	19701146	19702469	19.6613
chr11	19832607	19833587	4.99866
chr11	19962979	19964066	5.98716
chr11	20308179	20308445	3.99478
chr11	20429948	20430645	4.15826
chr11	20646501	20648001	15.9286
chr11	20671485	20672674	6.08468
chr11	20801162	20802247	9.38954
chr11	20845453	20846029	3.8313
chr11	20936843	20938044	13.8034
chr11	21157846	21158200	3.54194
chr11	21308161	21309415	12.0052
chr11	21725905	21726148	3.34087
chr11	21731004	21732452	8.52151
chr11	21749298	21750167	5.46608
chr11	21818071	21818600	4.64869
chr11	21871553	21871987	4.48521
chr11	21873649	21874516	5.3026
chr11	21967609	21968335	5.04033
chr11	22028701	22029804	8.24519
chr11	22059195	22060421	9.39287
chr11	22177180	22177553	3.82043
chr11	22705857	22706964	7.58012
chr11	22916683	22917555	8.40867
chr11	22920284	22921428	12.986
chr11	22981961	22982397	3.50435
chr11	22990769	22991427	4.47663
chr11	22994106	22994401	3.66783
chr11	23257064	23257651	3.1837
chr11	23307099	23307355	3.5396
chr11	23355586	23355933	3.8313
chr11	23384311	23385595	10.5339
chr11	23401081	23401600	3.40269
chr11	23617246	23617884	4.32174
chr11	23705047	23705798	4.97565
chr11	23717131	23718156	7.33112
chr11	23749504	23751089	13.2893
chr11	23888555	23889638	8.22581
chr11	24289566	24290715	7.75476
chr11	24421892	24423058	16.4191
chr11	24485814	24486549	3.99478
chr11	24638700	24640455	10.0891
chr11	24652835	24653228	3.34087
chr11	24795531	24796426	5.63065
chr11	25652574	25653043	4.81217
chr11	25680027	25680284	4.15265
chr11	25680429	25680726	3.54194
chr11	25864151	25865091	5.3026
chr11	26368232	26369850	18.7199
chr11	26493224	26493428	3.50435
chr11	26493526	26493988	3.8313
chr11	26524629	26526019	14.264
chr11	27077280	27077498	3.8313
chr11	27220959	27222069	6.44694
chr11	27334652	27335866	8.40867
chr11	28053109	28055264	23.1216
chr11	28198015	28198837	4.51667
chr11	28654952	28655807	6.7739
chr11	28868731	28869881	7.26433
chr11	28882225	28884919	23.2851
chr11	28982880	28984709	16.2556
chr11	29172112	29172348	3.10932
chr11	29177485	29178794	9.06258
chr11	29246354	29247067	4.43607
chr11	29319513	29321579	27.0451
chr11	29403932	29404621	6.28347
chr11	29489193	29490787	11.1878
chr11	29504188	29504618	3.29973
chr11	29512065	29512865	3.17104
chr11	29534435	29536274	9.17609
chr11	29606437	29607357	4.92429
chr11	29615159	29615552	3.40269
chr11	29681538	29682423	5.3026
chr11	29686158	29686434	3.17739
chr11	29696564	29697750	8.8991
chr11	29745347	29746536	11.0243
chr11	29796717	29797626	6.20072
chr11	29804927	29806769	20.1791
chr11	29862402	29862781	4.32174
chr11	30023315	30024008	4.97565
chr11	30117678	30118316	5.3026
chr11	30135290	30135788	4.32174
chr11	30142285	30144470	20.0156
chr11	30205581	30206409	5.95651
chr11	30314542	30315729	6.44694
chr11	30429397	30432333	31.9494
chr11	30450688	30452322	10.0434
chr11	30645029	30645513	3.62404
chr11	30870714	30871815	6.66488
chr11	31046603	31047255	3.87993
chr11	31270911	31273086	45.1911
chr11	31363554	31364685	10.6974
chr11	31375333	31376573	10.7828
chr11	31388203	31389330	9.71649
chr11	31503915	31505677	25.2468
chr11	31572166	31573440	6.88388
chr11	31613284	31615067	21.5891
chr11	31781975	31782710	7.10085
chr11	32339789	32340558	7.16162
chr11	32499380	32500744	4.99866
chr11	32717510	32719791	31.132
chr11	32795017	32796299	5.01652
chr11	32801930	32802778	6.28347
chr11	32916073	32917250	9.22606
chr11	32975173	32976045	3.99597
chr11	33055139	33056063	7.75476
chr11	33152767	33155017	11.462
chr11	33155128	33155459	3.34087
chr11	33161751	33163133	5.06213
chr11	33384651	33386259	16.0921
chr11	33513141	33513619	3.64248
[truncated: 12,689 more rows]

## Sheet: ZCWPW1 peaks in Prdm9 knockout
chr	start	end	fold change(peak intensity)
chr1	9746218	9746777	3.37069
chr1	9747080	9748071	4.09202
chr1	9748674	9748887	3.80308
chr1	9942763	9943896	3.53037
chr1	9944056	9944299	3.54301
chr1	16103558	16104316	3.3811
chr1	30947844	30948967	4.05732
chr1	36367747	36368138	4.13062
chr1	36682711	36683120	5.19504
chr1	39367921	39368900	3.90834
chr1	39901819	39902057	3.0287
chr1	39902420	39902668	3.25382
chr1	51476901	51477214	3.67159
chr1	55053021	55053577	3.41444
chr1	57406574	57406806	3.26545
chr1	58393982	58394186	3.5954
chr1	58422634	58423791	3.90196
chr1	59685419	59686007	3.3811
chr1	59763758	59763976	3.41444
chr1	59764545	59765025	3.54301
chr1	64533631	64533862	3.5408
chr1	72711314	72711593	3.47114
chr1	72711712	72712112	4.45258
chr1	74442279	74442577	3.55572
chr1	74816556	74816989	3.40674
chr1	75210719	75211005	3.41444
chr1	75508656	75508934	3.70667
chr1	75509223	75509742	3.57158
chr1	80338601	80338806	3.70667
chr1	80338992	80340296	5.36713
chr1	84838018	84838308	4.89605
chr1	86357949	86358619	4.23299
chr1	86526786	86529565	12.5323
chr1	93477833	93478065	4.17952
chr1	93753844	93754164	3.0287
chr1	105664377	105664886	4.20372
chr1	119419326	119420532	4.31047
chr1	130717517	130717734	3.15948
chr1	131525180	131525413	3.43183
chr1	131910901	131911473	4.31047
chr1	133131622	133132293	3.36149
chr1	133132491	133133598	3.17361
chr1	133133713	133134441	3.17871
chr1	133134987	133135187	3.0287
chr1	133365632	133365914	3.60173
chr1	134361176	134361728	3.5954
chr1	136625464	136626130	4.82941
chr1	144002742	144003449	3.28586
chr1	151345283	151345979	5.41197
chr1	153474137	153474392	3.43183
chr1	153480414	153480665	3.40477
chr1	153485670	153487812	3.61127
chr1	156472739	156473152	3.55572
chr1	157384210	157384410	3.15728
chr1	160211963	160212453	3.41444
chr1	161036057	161036426	3.73741
chr1	161249410	161249690	3.31065
chr1	162739115	162739814	3.82457
chr1	165641491	165641866	3.69064
chr1	165642166	165642607	4.57163
chr1	170771561	170771905	3.0287
chr1	171038511	171038783	3.92874
chr1	171246824	171247086	3.16681
chr1	178319126	178319948	3.66088
chr1	178328346	178328824	3.40477
chr1	178329185	178329422	3.40477
chr1	178329905	178330297	3.0287
chr1	178331121	178331354	3.52175
chr1	178333449	178333651	3.73393
chr1	178333843	178337589	7.35748
chr1	178337745	178338201	3.62261
chr1	178338355	178338556	3.60173
chr1	180809193	180809500	3.10286
chr1	180811356	180812078	3.92874
chr1	180812576	180813183	4.13062
chr1	181210445	181210654	3.32583
chr1	181921798	181922270	3.51867
chr1	182018474	182018770	3.10286
chr1	186968481	186968830	3.80017
chr1	191573818	191574920	4.2757
chr1	191718953	191719695	5.08594
chr1	191821932	191822775	3.6868
chr1	191907664	191908141	4.54102
chr10	4267831	4268250	3.55572
chr10	4269220	4269424	3.70667
chr10	4388080	4389121	3.48825
chr10	7792579	7792782	3.40477
chr10	9797851	9798422	4.82879
chr10	17723966	17726461	7.91464
chr10	23786164	23787197	3.50016
chr10	37135745	37137073	6.57473
chr10	40299828	40300632	4.35205
chr10	40300730	40301138	4.14521
chr10	41520479	41520923	3.63773
chr10	42273676	42275425	5.09547
chr10	42275522	42275864	3.92874
chr10	42502857	42503086	3.39301
chr10	56379006	56379297	3.70667
chr10	59223202	59223468	3.57158
chr10	59949299	59951238	5.27117
chr10	62578263	62578784	3.15948
chr10	63022588	63022948	3.35881
chr10	75936331	75936553	4.14854
chr10	75937286	75937503	3.02096
chr10	79669414	79669634	3.53037
chr10	79854762	79856170	4.55123
chr10	80039110	80039378	3.14949
chr10	80114747	80115032	3.15728
chr10	80131710	80132077	3.28586
chr10	80149587	80152261	4.98832
chr10	80168163	80168892	3.90196
chr10	80171821	80172092	4.35335
chr10	80172283	80172594	3.41444
chr10	80172740	80173252	5.98598
chr10	80292453	80293491	4.96848
chr10	80385895	80386479	3.3811
chr10	80398649	80398885	3.28311
chr10	80741255	80741523	3.47942
chr10	80741643	80741899	3.44913
chr10	80797276	80797777	3.87583
chr10	80826652	80828457	5.44955
chr10	80930476	80931058	4.38463
chr10	80931845	80932059	3.28311
chr10	81105713	81105957	3.67159
chr10	81153529	81154391	5.51808
chr10	81176616	81177995	6.62445
chr10	81182386	81182871	3.66088
chr10	85956922	85957329	3.88004
chr10	86703607	86703850	3.57158
chr10	86704501	86704712	3.48825
chr10	88459698	88460507	4.11394
chr10	88461396	88461660	3.54301
chr10	88462514	88463073	3.25382
chr10	88467162	88467428	3.55572
chr10	91123380	91123659	3.38685
chr10	96617867	96618901	5.04028
chr10	96619655	96619855	3.22236
chr10	99264549	99265767	5.15896
chr10	115385802	115386526	3.27601
chr10	116112973	116113303	3.58311
chr10	116113427	116113702	3.16834
chr10	117355942	117356152	3.85762
chr10	117375543	117375961	3.25382
chr10	117709068	117709557	3.20862
chr10	117709699	117710025	3.27395
chr10	120925978	120926589	4.00857
chr10	120977274	120978223	3.5954
chr10	127063541	127063781	3.27601
chr10	127291254	127291468	3.19483
chr10	127291583	127291866	3.0287
chr10	128037270	128037516	3.43709
chr10	128059574	128060440	3.09835
chr10	128061784	128062096	3.16387
chr10	128083590	128084551	5.37971
chr10	128547412	128549094	6.68557
chr10	128747947	128748466	3.65401
chr11	3290225	3290432	3.0287
chr11	3332162	3332461	3.16834
chr11	3648179	3648862	3.48825
chr11	4593981	4594262	3.63282
chr11	5062230	5062914	4.66688
chr11	5063482	5064678	3.94106
chr11	6415743	6417145	6.11456
chr11	6474172	6475728	6.0598
chr11	20020929	20021230	3.70667
chr11	23256134	23256526	3.67159
chr11	23306981	23307689	3.70255
chr11	29546781	29547901	4.42622
chr11	33160661	33160952	3.46609
chr11	33161255	33163148	5.81528
chr11	35769446	35769668	3.16681
chr11	45991524	45992099	5.66903
chr11	48800326	48801509	3.39301
chr11	50209594	50209927	3.03585
chr11	50210961	50211192	3.28586
chr11	50377892	50381277	11.9483
chr11	50386018	50386257	3.01255
chr11	51604931	51606808	7.21461
chr11	52099250	52100322	4.27651
chr11	52232196	52233407	3.4198
chr11	53299044	53299881	3.01799
chr11	54438641	54439046	3.28586
chr11	54866799	54867029	3.5954
chr11	58010176	58010764	3.29207
chr11	58316920	58317182	3.68841
chr11	59208834	59209047	3.26854
chr11	59963839	59964066	3.16516
chr11	60416953	60417183	3.16516
chr11	60417818	60418050	3.27395
chr11	60537955	60540038	7.75928
chr11	60540367	60540572	3.12883
chr11	62551400	62552234	10.2386
chr11	62552933	62554712	7.3867
chr11	62602851	62603622	4.54485
chr11	67588985	67589185	3.14949
chr11	68901586	68902910	6.55387
chr11	69097112	69097412	3.40674
chr11	69110383	69110598	3.03585
chr11	69110759	69111008	3.40674
chr11	69399425	69399904	3.70255
chr11	69411542	69412048	3.27395
chr11	69581855	69582123	3.19483
chr11	69662594	69662825	3.27203
chr11	69670124	69672380	7.58198
chr11	69672580	69673068	4.88117
chr11	69919095	69919529	3.0486
chr11	69919699	69920726	4.86429
chr11	69995272	69995613	3.27821
chr11	72441211	72441521	3.75678
chr11	74722545	74723844	5.71454
chr11	75178502	75179031	3.70255
chr11	75733284	75734210	4.45938
chr11	76845537	76845767	3.5567
chr11	77686654	77688259	5.01683
chr11	77688462	77688715	3.55572
chr11	77692942	77693179	3.14949
chr11	77984215	77985500	3.63962
chr11	78182256	78183468	6.00302
chr11	78244559	78245253	4.1859
chr11	80384263	80384547	3.17361
chr11	83474042	83474342	3.03585
chr11	84868842	84870041	7.27176
chr11	84870777	84871435	4.27037
chr11	85110809	85111631	3.8216
chr11	85233088	85234069	4.08181
chr11	85234177	85234705	5.34463
chr11	85312042	85312704	3.07787
chr11	86355784	86356051	3.5567
chr11	86356258	86356510	3.28586
chr11	86356764	86357024	3.40477
chr11	86357130	86357427	4.46142
chr11	87422294	87422566	3.28311
chr11	87426329	87426761	3.1549
chr11	88047938	88049676	12.5958
chr11	93886737	93887549	4.1859
chr11	94044028	94044764	7.03901
chr11	94320306	94320703	3.30644
chr11	94321007	94321418	4.02399
chr11	95990885	95991129	3.2956
chr11	96004689	96004969	4.1859
chr11	96005144	96005421	3.01255
chr11	96064077	96064438	3.73393
chr11	96789895	96790355	3.88004
chr11	96823619	96823828	3.03585
chr11	96826905	96827295	3.11984
chr11	97363639	97364162	3.54301
chr11	97781184	97782346	4.40734
chr11	98027512	98027777	3.27023
chr11	98203588	98205031	6.16695
chr11	98206364	98206844	3.8511
chr11	98795894	98796261	3.0287
chr11	98809706	98810091	3.1634
chr11	99023163	99024241	5.66903
chr11	99229814	99230356	4.26189
chr11	100320023	100321228	6.93909
chr11	100470421	100472365	5.3431
chr11	100526687	100526887	3.0287
chr11	101442255	101443310	6.68557
chr11	101666061	101667788	3.44913
chr11	101668007	101668389	3.55572
chr11	102309007	102309697	4.23828
chr11	102316571	102316836	3.2469
chr11	102666215	102667258	6.25028
chr11	102667502	102667770	3.15728
chr11	103115249	103115926	3.84058
chr11	103117652	103118291	4.23828
chr11	103132765	103133069	3.0287
chr11	104440883	104441381	3.37573
chr11	104468164	104468395	3.25382
chr11	105180438	105180798	3.57159
chr11	105182204	105182615	3.37069
chr11	106217587	106218024	3.58782
chr11	106271827	106272189	3.28883
chr11	106501188	106501732	4.35205
chr11	106778865	106781231	3.74124
chr11	106781377	106781778	3.87299
chr11	106782407	106783384	4.08181
chr11	106783942	106788698	21.9092
chr11	106997881	106999244	5.21452
chr11	107686510	107686816	4.61237
chr11	109011669	109012098	4.64212
chr11	112783905	112785902	5.85741
chr11	112786448	112786809	4.04273
chr11	114668738	114669036	3.95039
chr11	114669151	114669472	4.3958
chr11	114669713	114670207	3.68841
chr11	115535212	115535455	3.27395
chr11	116020614	116020908	4.00829
chr11	116021033	116024938	9.92427
chr11	116671467	116671672	3.03585
chr11	116842173	116842614	3.38734
chr11	116848522	116849042	4.55342
chr11	116849646	116849891	3.80017
chr11	116850114	116853651	15.3936
chr11	117655522	117655790	3.5954
chr11	117655932	117656438	3.16681
chr11	119082604	119082867	3.86687
chr11	119083096	119083296	3.33441
chr11	119084877	119085710	3.58506
chr11	120187896	120188439	4.44305
chr11	120230008	120230378	3.16681
chr11	120236843	120237787	3.79049
chr11	120344905	120345803	3.95851
chr11	120346302	120348845	14.3435
chr11	120597206	120598018	5.96753
chr11	120784521	120784754	3.93947
chr11	120821796	120822231	3.28586
chr11	120823215	120823880	3.26545
chr11	120990060	120990585	4.33892
chr11	120990900	120991245	3.1634
chr12	3235360	3236850	4.7667
chr12	3308930	3309262	4.31047
chr12	8498001	8499396	6.17331
chr12	8674665	8675371	4.46142
chr12	8675498	8675752	3.85762
chr12	12938538	12938748	3.6837
chr12	12939054	12940462	6.90507
chr12	14149079	14149510	4.76332
chr12	14149607	14149881	3.60853
chr12	14150159	14150588	4.14854
chr12	21414957	21415675	3.82457
chr12	21415811	21417456	9.27423
chr12	24651334	24651554	3.0486
chr12	28634775	28635916	6.91698
chr12	32954560	32954827	3.67159
chr12	32954923	32955338	4.61237
chr12	40036119	40036829	4.36031
chr12	40221648	40222112	3.46609
chr12	44208824	44209523	3.49769
chr12	51690546	51691364	5.06522
chr12	51768116	51769190	3.5954
chr12	54984828	54985082	3.70667
chr12	54985184	54985492	3.55572
chr12	55490271	55490959	4.13062
chr12	55491109	55492121	4.4711
chr12	59067513	59067811	3.28057
chr12	59218058	59218357	3.40477
chr12	59218568	59218775	3.29207
chr12	64968102	64968302	3.25382
chr12	69158024	69159051	4.34543
chr12	69184601	69185622	4.2757
chr12	69372140	69374653	13.3167
chr12	75983882	75984090	3.2956
chr12	76404451	76406725	7.11571
chr12	78350887	78351117	4.75402
chr12	80108982	80109290	4.61237
chr12	80109518	80110868	5.21617
chr12	80945697	80947532	13.3657
chr12	80947690	80948260	3.66725
chr12	83633368	83633587	3.85762
chr12	86881725	86882726	4.73518
chr12	86883250	86883463	3.49769
chr12	100201760	100202163	3.58605
chr12	101081475	101082993	4.54485
chr12	102867173	102867705	4.76332
chr12	108793490	108795335	8.63135
chr12	110693319	110694164	4.32428
chr12	110694309	110696574	11.8458
chr12	110850309	110850844	3.5954
chr12	111538259	111540690	8.48253
chr12	112828517	112828949	3.16151
chr12	112976446	112976646	3.41444
chr13	14064793	14065853	5.60126
chr13	17802566	17804032	4.64307
chr13	21181045	21181544	3.40477
chr13	21940267	21940588	3.28586
chr13	23436883	23437238	3.80017
chr13	23530332	23530652	5.3431
chr13	24801916	24803179	3.91684
chr13	24803406	24803705	3.58782
chr13	28949550	28949870	3.70667
chr13	28950165	28951562	5.66903
chr13	37931314	37931527	3.0287
chr13	43479145	43479512	3.25382
chr13	44731911	44732199	3.29579
chr13	44869565	44869957	10.7084
chr13	46726135	46726722	3.40477
chr13	46727158	46727672	3.40674
chr13	47104771	47106220	3.63282
chr13	48545269	48545734	3.6868
chr13	49246610	49246813	3.42277
chr13	49678327	49678623	3.10286
chr13	51651165	51651672	4.67655
chr13	51651787	51651987	3.06465
chr13	51847350	51848760	4.45258
chr13	54505125	54505486	3.28883
chr13	55212492	55213836	6.34949
chr13	58126229	58128257	13.8102
chr13	58392564	58392891	3.88004
chr13	58399947	58402176	9.16709
chr13	64366619	64366864	3.40477
chr13	64368199	64369764	4.61237
chr13	73328475	73328681	3.16681
chr13	74061725	74061959	4.17226
chr13	80885061	80885558	4.44305
chr13	81694509	81694821	3.40477
chr13	90923279	90924055	4.7567
chr13	90924189	90924469	3.70667
chr13	93304809	93305029	3.10286
chr13	93497367	93498765	7.27176
chr13	98889918	98890657	3.27395
chr13	100652455	100652655	3.90127
chr13	100653040	100653329	3.07322
chr13	100730272	100730728	3.04246
chr13	103773298	103774215	4.76212
chr13	104661002	104661227	3.40477
chr13	111487964	111489528	6.59618
chr13	111688173	111688373	3.25382
chr13	113616635	113617485	3.67159
chr13	119430502	119430731	3.53037
chr13	119691868	119692134	3.09325
chr14	18269530	18270878	3.33639
chr14	18330661	18330872	3.28586
chr14	20544765	20544965	3.28586
chr14	20545488	20546052	5.13701
chr14	21832798	21833101	3.19483
chr14	24490863	24491831	5.66795
chr14	26437756	26438368	3.92874
chr14	26438591	26438992	3.47942
chr14	26533540	26534277	3.48825
chr14	26639195	26639628	3.99489
chr14	27429154	27430264	4.55973
chr14	27430511	27430716	3.3811
chr14	31018863	31019319	3.71134
chr14	45656549	45656855	3.70667
chr14	47299052	47299582	3.67126
chr14	49172604	49173984	5.13912
chr14	50925559	50925844	3.82457
chr14	51064621	51065321	3.16834
chr14	52072269	52072480	3.01255
chr14	52099703	52099971	3.55572
chr14	52102059	52104063	5.95265
chr14	54360963	54361322	3.05432
chr14	54576015	54576514	3.6868
chr14	54883571	54883898	3.52375
chr14	54893405	54893745	3.16516
chr14	54896151	54896623	3.63014
chr14	54912174	54912394	3.40477
chr14	56402870	56403147	3.0287
chr14	56776441	56777874	7.02758
chr14	56810244	56810686	3.35034
chr14	57889201	57889473	3.0287
chr14	60285074	60285364	3.10286
chr14	61646929	61648417	6.87663
chr14	61648513	61648739	3.05966
chr14	61648991	61649417	3.15231
chr14	62758649	62759171	3.67159
chr14	62759306	62760191	6.16695
chr14	65969688	65970048	4.31448
chr14	66297720	66297955	3.1549
chr14	67069615	67069832	3.10208
chr14	67070982	67072195	3.33944
chr14	69249297	69249520	3.85762
chr14	72603020	72603316	5.06522
chr14	75327480	75328414	5.21617
chr14	75845530	75847115	3.90834
chr14	76415989	76416327	3.58605
chr14	76416428	76416808	3.28586
chr14	76505322	76507676	6.6372
chr14	79480392	79480633	3.35663
chr14	106107180	106107474	3.41444
chr14	115042418	115042779	4.1859
chr15	5117055	5117627	3.05966
chr15	12118267	12119826	3.30534
chr15	25412066	25412491	3.42277
chr15	25984884	25985951	3.57159
chr15	34440208	34440408	3.10208
chr15	34442527	34442761	3.0287
chr15	35937786	35938149	3.85762
chr15	36605016	36605368	3.55572
chr15	36606442	36608877	4.06512
chr15	38517936	38518423	4.27217
chr15	52041150	52041536	3.16681
chr15	52041634	52044399	7.17853
chr15	58889811	58890028	3.82457
chr15	73644886	73645346	3.70667
chr15	76069564	76070174	3.58052
chr15	76639895	76640100	3.25382
chr15	76853346	76854023	3.80017
chr15	76903919	76905519	3.63753
chr15	79029920	79030120	3.18141
chr15	79544963	79545877	3.5954
chr15	80081789	80082666	3.80969
chr15	80082923	80083478	4.88542
chr15	80255328	80257086	9.70282
chr15	81586351	81587671	5.98598
chr15	81587847	81588122	4.02615
chr15	81772662	81772963	3.15728
chr15	81811831	81812253	4.14854
chr15	82046343	82047249	3.44913
chr15	83365985	83367069	4.91859
chr15	84924198	84924432	3.28883
chr15	85673075	85673684	3.48929
chr15	88732420	88732883	3.15728
chr15	88863398	88864137	3.6868
chr15	88983410	88984107	4.41013
chr15	96288559	96289484	3.41697
chr15	96696876	96697474	4.70663
chr15	96697693	96699003	7.36297
chr15	98533147	98533696	3.85762
chr15	98566683	98566922	3.57158
chr15	98662647	98662847	3.15728
chr15	98870567	98871203	4.35799
chr15	98933094	98933435	3.67159
chr15	98951649	98952459	3.55572
chr15	100422020	100422702	3.70667
chr15	100579427	100579649	3.10286
chr15	102331425	102331677	4.27217
chr15	102446269	102446540	4.31047
chr15	102473361	102473774	4.61237
chr15	102670730	102670932	3.16681
chr15	103240330	103241889	6.59554
chr16	4212468	4212810	3.15728
chr16	5013796	5014011	3.67159
chr16	5050832	5051439	4.54989
chr16	8422989	8423324	3.25382
chr16	8737233	8738417	3.03982
chr16	8830626	8833198	5.25421
chr16	10784270	10784586	3.09842
chr16	11143945	11144280	5.17552
chr16	11202373	11202592	3.02096
chr16	11252981	11253816	4.46448
chr16	13867809	13868554	4.30377
chr16	17200940	17201172	3.26854
chr16	17222266	17222496	3.66343
chr16	17452673	17453532	4.63165
chr16	18248040	18248259	3.39301
chr16	18288353	18288618	3.40477
chr16	18581730	18581941	3.02096
chr16	20651728	20652211	3.27395
chr16	20673083	20673947	3.8165
chr16	22263893	22264233	3.02096
chr16	22264331	22265611	7.14318
chr16	23107334	23109875	7.1164
chr16	23110547	23110954	3.58782
chr16	23112778	23113110	3.25382
chr16	30066921	30067306	4.23828
chr16	33056863	33057970	4.45938
chr16	33400047	33400587	4.31837
chr16	36828536	36829357	5.30976
chr16	36829560	36829760	3.44171
chr16	38091096	38091314	3.20837
chr16	55905375	55905632	3.40477
chr16	55966441	55966906	3.35729
chr16	55974103	55974769	3.27395
chr16	57391274	57391671	5.09603
chr16	64850731	64850954	3.57158
chr16	64852614	64853569	5.80771
chr16	77501128	77501328	3.25382
chr16	78375597	78376015	4.15952
chr16	90221006	90222428	3.72466
chr16	91648533	91649666	3.27395
chr16	91688968	91689269	3.2956
chr16	92058744	92059876	5.43179
chr16	96081126	96081834	4.27359
chr16	96126418	96127742	5.42352
chr17	3115978	3116351	3.0287
chr17	6960789	6961063	3.70667
chr17	10316307	10316811	3.67126
chr17	10316921	10318526	4.3958
chr17	12917233	12917458	3.48929
chr17	12991799	12992129	3.49769
chr17	23802570	23802933	4.31837
chr17	23803460	23805291	6.80983
chr17	23807445	23807705	3.01709
chr17	24415029	24415754	3.35729
chr17	24426073	24427421	3.44913
chr17	24470600	24471664	5.42352
chr17	24528241	24528827	3.51867
chr17	24719152	24721096	10.4023
chr17	24721411	24721691	4.1859
chr17	24960887	24961210	4.41013
chr17	25013555	25014061	5.52406
chr17	25272303	25273439	3.54097
chr17	27634112	27635142	4.30377
chr17	28328466	28329871	9.4122
chr17	28692397	28692607	3.05966
chr17	29032735	29034795	5.37779
chr17	29035044	29035275	3.31647
chr17	29035575	29035928	3.49559
chr17	29491392	29493189	6.50029
chr17	31657869	31658269	3.28586
chr17	32321277	32321862	5.10227
chr17	33684700	33685407	4.69267
chr17	33823566	33824704	5.24868
chr17	33910271	33910518	3.39962
chr17	33951366	33951566	3.38708
chr17	33951664	33952014	3.16681
chr17	33954903	33955744	6.11252
chr17	33998861	33999806	3.01799
chr17	34027857	34028068	3.06933
chr17	34116002	34120386	14.0108
chr17	34120627	34121561	4.0249
chr17	34899065	34900048	4.46142
chr17	35148164	35148382	3.85762
chr17	35163570	35165158	8.38974
chr17	35242091	35243008	4.27474
chr17	35836450	35837239	3.87294
chr17	35917017	35918748	12.5555
chr17	35918866	35919206	3.80017
chr17	36838134	36838424	3.70667
chr17	45432677	45433043	3.40674
chr17	45571398	45571776	3.39301
chr17	45571941	45573138	4.73491
chr17	46856506	46856871	4.1859
chr17	47672184	47672837	3.26545
chr17	48408149	48408696	3.65696
chr17	50291945	50293126	5.58954
chr17	50293222	50293438	3.63282
chr17	50293964	50294185	3.54301
chr17	53485228	53485544	3.40477
chr17	56613426	56614596	6.90124
chr17	56626663	56626878	3.28311
chr17	56673133	56673394	3.05966
chr17	65611291	65612884	5.13759
chr17	66447262	66448286	3.54301
chr17	70847880	70848091	3.25382
chr17	72837392	72838019	3.92874
chr17	80054411	80054623	3.80017
chr17	80060523	80060934	3.87299
chr17	80061040	80061452	3.07795
chr17	80200269	80200759	4.00857
chr17	80201606	80201912	3.10286
chr17	80202477	80202891	3.55482
chr17	80203173	80203456	3.32583
chr17	80203725	80204562	5.51808
chr17	80204717	80207430	16.3865
chr17	84181875	84182082	3.40477
chr17	84184754	84187376	8.40855
chr17	87133900	87134126	3.70667
chr17	87134360	87134875	3.70667
chr17	87442016	87442255	3.70667
chr17	87444548	87444870	3.00338
chr17	87445660	87446496	5.21617
chr17	88486553	88487205	3.70255
chr18	6239964	6240227	3.62261
chr18	6240323	6240728	3.99086
chr18	6241153	6241711	3.5567
chr18	7869530	7870818	4.09202
chr18	10029812	10030012	3.55572
chr18	10181024	10181432	4.00857
chr18	10608651	10608851	3.70667
chr18	10610153	10610400	3.16516
chr18	10726708	10726985	3.44171
chr18	11657560	11657808	3.27395
chr18	21002492	21003011	3.90127
chr18	24019966	24020331	3.37573
chr18	31805094	31805346	3.10286
chr18	34862301	34862954	5.05283
chr18	34930641	34931523	4.16275
chr18	34953891	34954099	3.00206
chr18	35562401	35563105	3.26022
chr18	35563248	35564313	3.44913
chr18	35599237	35599508	3.27821
chr18	36287172	36288745	8.70169
chr18	36669752	36670418	4.27037
chr18	36765219	36765486	3.5382
chr18	38420414	38420880	3.91926
chr18	42512286	42512568	4.11394
chr18	46522597	46523063	4.09776
chr18	46523190	46525155	5.96801
chr18	47052191	47052391	3.00338
chr18	49833217	49833823	3.43183
chr18	57879400	57879864	5.21617
chr18	60774995	60775807	3.897
chr18	61556092	61558152	5.82539
chr18	61558329	61558559	3.25382
chr18	68692062	68692283	3.54704
chr18	73573722	73575230	4.95736
chr18	73862551	73862767	3.40477
chr18	75000551	75001680	5.25234
chr18	75370449	75370824	3.67159
chr18	76242951	76243163	3.70667
chr18	77774795	77775076	3.58782
chr18	80207222	80207500	3.35729
chr18	80860052	80860264	3.29207
chr19	3389303	3389744	3.44261
chr19	3389841	3390549	4.64307
chr19	3574478	3574993	4.1742
chr19	3852055	3852471	3.73393
chr19	3852742	3853410	3.78555
chr19	4148424	4148757	3.1634
chr19	4192355	4192570	3.03585
chr19	4257412	4258079	3.70255
chr19	4395586	4396496	4.64448
chr19	4793158	4794527	5.08594
chr19	4811821	4812138	3.08177
chr19	5273060	5273284	4.15847
chr19	5425521	5425978	3.28057
chr19	5795527	5796264	3.25382
chr19	5796669	5801268	5.83062
chr19	5801454	5801713	4.04116
chr19	6058119	6058943	3.11125
chr19	6061201	6061600	3.77764
chr19	6341089	6341659	4.06309
chr19	6364157	6365314	4.6645
chr19	7205841	7206144	3.07787
chr19	8713096	8713656	3.54097
chr19	8723592	8724398	4.44305
chr19	8740947	8741279	4.09244
chr19	8798297	8798616	3.28586
chr19	8819238	8819449	3.0287
chr19	8820604	8821792	4.06268
chr19	8897817	8898208	4.50544
chr19	21272523	21275405	7.32948
chr19	24476188	24476584	3.63773
chr19	25506645	25507148	3.73741
chr19	32758454	32758683	3.1634
chr19	38931320	38931607	3.27023
chr19	41936012	41936229	3.35663
chr19	44294906	44295611	3.54097
chr19	44295811	44297242	4.42622
chr19	45780949	45781180	3.25382
chr19	45781940	45782282	4.76332
chr19	45997868	45998103	3.16681
chr19	53312270	53312611	3.16978
chr19	53313292	53313539	3.62261
chr19	53389664	53390009	3.91114
chr19	53601223	53601804	3.63773
chr19	59344270	59344872	3.75678
chr19	60579422	60579629	4.00793
chr19	60788957	60790333	4.36754
chr2	3285127	3285437	3.85762
chr2	5379152	5379376	6.14589
chr2	5894200	5894654	3.0287
chr2	13575324	13575808	4.15952
chr2	13576126	13576566	3.8511
chr2	18057592	18057858	3.57158
chr2	18065112	18066130	6.24314
chr2	18066484	18066794	3.57158
chr2	18672762	18673004	4.1859
chr2	18676232	18676494	3.42277
chr2	20966792	20967199	3.71134
chr2	23039045	23039289	3.40477
chr2	24918986	24919452	4.05732
chr2	25223680	25224569	6.11252
chr2	26910585	26912045	10.5858
chr2	26912198	26912480	4.14097
chr2	27539696	27539903	3.43183
chr2	29123997	29129051	6.39712
chr2	29133702	29133992	3.70667
chr2	29966021	29966929	3.80969
chr2	30067644	30067890	3.71134
chr2	30068104	30068409	3.28586
chr2	30069009	30069319	3.63742
chr2	31572592	31572805	3.05966
chr2	31759723	31760176	3.15728
chr2	32151121	32151744	4.46448
chr2	32287228	32287625	3.2956
chr2	32536711	32536929	3.15231
chr2	32537215	32537480	3.03585
chr2	32961738	32962825	4.72371
chr2	34370194	34370750	4.20372
chr2	34772101	34773557	10.6032
chr2	35132173	35132646	3.39301
chr2	35199260	35200641	3.46841
chr2	37422267	37422558	3.58782
chr2	37451718	37452076	3.0287
chr2	39004331	39005110	3.33944
chr2	48931981	48932181	3.10286
chr2	49537092	49537391	3.25382
chr2	52073859	52074108	3.82076
chr2	57182321	57182594	4.31047
chr2	61711808	61712157	3.73393
chr2	62664960	62665163	3.0287
chr2	69823634	69823840	3.28057
chr2	69823982	69824922	3.52375
chr2	69826256	69826465	3.67532
chr2	69861964	69862869	3.95851
chr2	72977888	72979332	7.27365
chr2	73313108	73313490	3.0287
chr2	73891217	73891749	4.76332
chr2	73910575	73910900	3.54301
chr2	74564195	74564424	3.25382
chr2	75658573	75658817	3.53037
chr2	75659618	75660951	4.55123
chr2	75662121	75662340	3.70667
chr2	75664068	75664332	3.40477
chr2	75664878	75665176	3.40477
chr2	75703063	75703416	3.0287
chr2	78869801	78870751	3.5567
chr2	90916882	90917308	3.80017
chr2	90917442	90917680	3.27023
chr2	90917796	90918196	3.37573
chr2	93813231	93813530	4.02399
chr2	103073149	103073434	3.39962
chr2	103795011	103797250	5.6699
chr2	104470964	104471740	3.48825
chr2	105127162	105127395	3.67159
chr2	105128178	105129086	4.58999
chr2	105130541	105130907	3.3811
chr2	117122804	117123107	4.00857
chr2	118972692	118972892	3.50544
chr2	119277672	119278166	3.85762
chr2	119594350	119594983	3.5954
chr2	120729433	120729649	4.23299
chr2	121449874	121450649	3.48825
chr2	121956620	121957028	3.91684
chr2	122029118	122029907	4.70921
chr2	122607619	122608687	4.00857
chr2	122608790	122610366	4.94731
chr2	125722301	125722503	3.40477
chr2	128967915	128968499	5.56312
chr2	128968622	128968938	3.26591
chr2	129801521	129802117	3.08545
chr2	130178164	130178820	3.06933
chr2	131234085	131234288	3.0287
chr2	132577133	132577434	3.8511
chr2	144269361	144269667	3.25382
chr2	144269874	144270598	4.46142
chr2	152412453	152412990	3.45742
chr2	152413777	152414248	3.27395
chr2	152414542	152414798	3.73741
chr2	152707492	152707842	4.09244
chr2	153346621	153346996	3.26545
chr2	154657062	154657289	3.26545
chr2	154891821	154892484	3.62261
chr2	156161059	156161281	3.25382
chr2	156167485	156167811	3.10286
chr2	156172500	156172759	3.10286
chr2	156177612	156180272	10.7378
chr2	156862786	156863071	4.36527
chr2	162932665	162932901	3.67204
chr2	163642169	163642392	3.40477
chr2	163642723	163644683	3.90834
chr2	164070228	164070518	3.39301
chr2	164441172	164441962	3.41444
chr2	164442189	164442389	3.1549
chr2	164879666	164880110	3.26545
chr2	166996441	166996837	3.54301
chr2	167063364	167063832	3.26854
chr2	167063986	167064613	3.6042
chr2	167504052	167504761	3.09835
chr2	168206041	168206598	3.87294
chr2	168207177	168207906	3.91684
chr2	178406361	178406732	3.44171
chr2	179975033	179975376	3.15231
chr2	180171720	180172027	3.95039
chr2	180172129	180172746	4.70021
chr2	180257363	180258259	3.74124
chr2	180659315	180659951	3.10286
chr2	180710924	180711400	3.80017
chr2	180919507	180920309	3.25411
chr2	181287288	181287861	3.40477
chr2	181288355	181288636	3.01255
chr3	5860365	5860802	4.38336
chr3	9251748	9252676	3.35729
chr3	16184670	16184953	3.44171
chr3	30793584	30794173	3.17582
chr3	31150774	31151085	3.06933
chr3	31151346	31152960	3.80969
chr3	37481173	37481984	8.23519
chr3	51416895	51417444	3.3811
chr3	52269615	52270104	4.22638
chr3	58415393	58418783	10.9637
chr3	58419316	58419639	3.10286
chr3	58520664	58520864	3.40477
chr3	61366269	61366589	3.40477
chr3	65391986	65392260	4.00857
chr3	65954729	65954929	3.67159
chr3	65956034	65957710	5.30976
chr3	69004945	69007146	6.02068
chr3	69007255	69007560	3.88004
chr3	69044062	69044625	3.42277
chr3	69125207	69126607	6.12188
chr3	86141325	86142546	5.63121
chr3	86225212	86225448	3.5567
chr3	88686311	88686579	3.47942
chr3	89962948	89963148	3.30259
chr3	90051715	90051921	3.96701
chr3	90052984	90053464	3.4107
chr3	90080292	90080498	3.0287
chr3	90212466	90213620	3.92874
chr3	90293608	90293960	3.67159
chr3	90475742	90475979	3.25382
chr3	90507983	90509168	4.54989
chr3	94785342	94785725	3.29207
chr3	94838152	94838612	3.15231
chr3	95161951	95162404	3.54301
chr3	95217827	95218191	3.27395
chr3	95281328	95281734	3.28057
chr3	95560252	95561375	3.01799
chr3	95588775	95589377	4.35205
chr3	95625678	95626000	3.06933
chr3	95658985	95660694	8.30911
chr3	95817568	95817832	3.60853
chr3	95818138	95818434	3.17361
chr3	96172518	96172931	3.0486
chr3	96173058	96173494	3.80017
chr3	96558639	96561014	4.23828
chr3	102933761	102935999	18.4899
chr3	103057824	103058098	4.02399
chr3	105958181	105958995	5.07835
chr3	107331453	107332386	3.0299
chr3	107333802	107334478	3.51867
chr3	107985218	107985749	3.92874
chr3	108014017	108014778	4.00857
chr3	108015209	108017060	4.95736
chr3	108909964	108910853	4.66688
chr3	123506615	123508257	4.31142
chr3	130729106	130730019	4.42622
chr3	135410647	135410971	4.1859
chr3	135439444	135441481	8.48961
chr3	137865057	137866198	5.81978
chr3	137867202	137867813	3.92874
chr3	138528183	138528394	3.13866
chr3	152225943	152226373	3.40477
chr3	153905633	153905951	3.46336
chr3	158030525	158031828	5.11503
chr4	3834224	3835167	3.91684
chr4	11156030	11156255	3.27395
chr4	11190507	11190894	3.27395
chr4	11965136	11965413	3.55572
chr4	15267451	15267902	3.28586
chr4	21848053	21848378	3.39962
chr4	33245715	33247682	3.66088
chr4	40267733	40268732	4.3958
chr4	40722730	40723401	3.07373
chr4	40724724	40725096	3.17838
chr4	42998878	43000037	6.62887
chr4	46451528	46451858	3.82457
chr4	46451983	46453056	5.64111
chr4	48617185	48617499	5.19504
chr4	56821459	56821724	3.80017
chr4	62524221	62524460	3.41444
chr4	62524579	62525250	3.70255
chr4	83485586	83485847	3.62261
chr4	86576122	86576910	3.48825
chr4	86855970	86857299	6.38124
chr4	89689526	89690173	3.92874
chr4	89690628	89691147	4.31047
chr4	103119094	103119353	3.15728
chr4	103119554	103120215	3.71938
chr4	107803849	107804083	3.27821
chr4	107923435	107923645	3.08758
chr4	108848808	108849141	3.8511
chr4	109280099	109280321	3.57158
chr4	109281213	109281598	5.08594
chr4	109281712	109282006	3.10286
chr4	116075655	116076239	3.16978
chr4	116076334	116076729	4.24261
chr4	116626149	116626617	3.70667
chr4	116685494	116685780	3.1778
chr4	116686078	116687186	3.96701
chr4	117155023	117156058	7.66702
chr4	118436209	118436900	6.12665
chr4	119292332	119294264	4.91335
chr4	120405517	120405857	3.15728
chr4	123016799	123017063	4.31837
chr4	123411490	123411773	3.10286
chr4	126201286	126202674	5.8185
chr4	127021360	127024900	14.5678
chr4	127025024	127025623	3.6042
chr4	127025779	127026052	3.91926
chr4	127027004	127027425	3.57158
chr4	127032073	127032273	3.25382
chr4	128728433	128728633	3.82076
chr4	129333632	129335280	4.2234
chr4	129513796	129515623	7.73071
chr4	129741203	129741403	3.67159
chr4	130664013	130664356	3.40674
chr4	131922141	131922641	3.67159
chr4	132210733	132211484	3.63282
chr4	132260488	132260881	4.00857
chr4	132352600	132352839	3.15948
chr4	133583889	133584366	5.01396
chr4	133752541	133753038	3.95039
chr4	133966571	133967899	10.0243
chr4	134128722	134129090	3.80017
chr4	134185636	134186904	4.57163
chr4	134343957	134344368	3.48929
chr4	134852169	134852516	3.52731
chr4	134923394	134925644	20.3906
chr4	134925784	134926192	3.40674
chr4	135856127	135858057	5.41691
chr4	135858167	135858433	3.29207
chr4	135871258	135871806	4.00793
chr4	135872026	135874094	8.41705
chr4	136290157	136290887	3.5954
chr4	137356400	137356986	4.66688
chr4	137993724	137994331	3.54301
chr4	140701220	140701420	3.40477
chr4	140702516	140703039	3.48825
chr4	141872013	141873285	4.44305
chr4	148625131	148626302	3.72466
chr4	150048867	150049343	3.69064
chr4	150049475	150049785	3.70667
chr4	150050112	150050394	3.40477
chr4	150569476	150569694	3.80017
chr4	150569921	150570406	3.15231
chr4	150855829	150856155	3.93368
chr4	151993813	151994069	3.16681
chr4	151994224	151994588	3.06465
chr4	151994693	151995381	4.28084
chr4	154011832	154012032	3.04246
chr4	155221056	155221408	3.41444
chr4	155492194	155492901	4.55973
chr4	155624873	155625130	3.27601
chr4	155760883	155761229	3.14949
chr4	155812397	155812600	3.65401
chr4	155812724	155813335	4.23828
chr5	3733121	3733505	3.70667
chr5	21786932	21787175	3.73393
chr5	23432171	23432958	3.85221
chr5	23435700	23436053	3.85221
chr5	24840539	24841564	3.82457
chr5	31201668	31203056	5.86899
chr5	31241220	31241928	3.5954
chr5	31251091	31252021	5.47167
chr5	32711084	32711403	3.22273
chr5	32712112	32714751	9.82188
chr5	33019413	33020399	3.72466
chr5	33020514	33020902	4.31448
chr5	33336343	33336638	4.31047
chr5	33651649	33652316	3.26854
chr5	33821695	33822103	3.30259
chr5	34336941	34337159	3.80017
chr5	34337319	34337833	3.54301
chr5	35391989	35392700	4.59015
chr5	35399814	35400034	3.67159
chr5	36530376	36530612	3.91684
chr5	36794727	36795047	3.82784
chr5	36795683	36796313	3.3811
chr5	45520765	45521000	3.10286
chr5	65390418	65391521	4.94665
chr5	65696436	65696958	3.85762
chr5	67426550	67427282	3.54301
chr5	72328084	72328341	3.40477
chr5	99906224	99906486	3.55572
chr5	99976792	99978561	5.34846
chr5	99978668	99978868	3.26854
chr5	100037748	100038589	5.16033
chr5	100038771	100039172	3.27395
chr5	106695570	106696010	3.75678
chr5	107331230	107332286	3.08177
chr5	107358977	107360803	3.61127
chr5	110445699	110447869	3.26545
chr5	110769397	110769715	3.69064
chr5	115267085	115267285	3.54301
chr5	115271123	115271370	3.20781
chr5	115271669	115272456	3.48825
chr5	115299564	115300538	5.36532
chr5	115547003	115547347	3.40477
chr5	115559598	115560586	4.22638
chr5	117285989	117286266	4.00793
chr5	117977179	117978411	4.49425
chr5	121204626	121205295	3.26545
chr5	121828403	121828748	5.08594
chr5	121828862	121829290	3.15728
chr5	122158739	122160062	6.50029
chr5	122371326	122371818	4.00857
chr5	122500662	122501732	4.45258
chr5	123748660	123749124	3.40674
chr5	123929943	123930145	3.44171
chr5	124446491	124446715	3.27203
chr5	125177764	125177964	3.27395
chr5	125178499	125178730	3.04635
chr5	125388291	125389613	7.21645
chr5	125404129	125404501	5.5376
chr5	129020442	129021868	8.31671
chr5	129883323	129883523	3.41444
chr5	129884220	129884596	3.20781
chr5	129885199	129886576	4.76332
chr5	132541033	132541242	3.25382
chr5	134184062	134184323	3.67159
chr5	135349196	135349955	4.82941
chr5	136274396	136275384	5.73835
chr5	137294722	137294988	3.51867
chr5	137785586	137785981	3.55058
chr5	137788777	137788996	3.05966
chr5	138280879	138281306	4.07743
chr5	139252693	139252997	3.4306
chr5	139810269	139811569	4.61059
chr5	139812221	139812421	3.55572
chr5	139812570	139812875	3.40477
chr5	142529766	142530297	3.15728
chr5	142607100	142607504	4.15952
chr5	142607702	142607902	4.15952
chr5	142814840	142815122	4.76212
chr5	142903072	142906804	15.8232
chr5	143526846	143527313	4.00857
chr5	145139721	145140184	3.15728
chr5	145218684	145218885	3.40477
chr5	145232384	145232732	3.10286
chr5	146261004	146261347	4.92659
chr5	149050466	149052494	7.48043
chr5	149052642	149052907	3.39962
chr5	150664787	150664997	3.0287
chr6	3201332	3201609	3.91982
chr6	28260200	28260420	3.5567
chr6	28260652	28261033	3.3811
chr6	33059423	33059706	3.15728
chr6	34315687	34316566	3.75678
chr6	34355326	34355641	3.28586
chr6	35177484	35177764	3.44171
chr6	38435085	38435306	3.54301
chr6	38550628	38551095	4.05732
chr6	38552106	38552895	5.4909
chr6	39205392	39206381	3.99489
chr6	42350790	42351796	4.24126
chr6	42352209	42352409	3.27519
chr6	47455118	47455412	3.17114
chr6	48063351	48063669	3.03585
chr6	48063921	48064958	3.54097
chr6	48085859	48086140	3.58782
chr6	49262389	49262808	3.4039
chr6	49262977	49263506	4.1859
chr6	50565391	50566387	4.27037
chr6	51464449	51464649	3.0287
chr6	51466046	51466545	3.80969
chr6	51466746	51469756	13.1316
chr6	51471064	51471608	3.67159
chr6	54431671	54431995	3.388
chr6	71631530	71632245	4.41013
chr6	72360579	72360893	3.8511
chr6	72432109	72432430	3.10286
chr6	72433033	72433310	3.70667
chr6	72436450	72436924	4.21539
chr6	72437169	72439463	7.11144
chr6	72615980	72616180	3.02096
chr6	72957583	72957996	4.02615
chr6	83121769	83122235	3.26545
chr6	85960702	85961238	3.40477
chr6	86524143	86526933	12.6043
chr6	86667393	86667600	3.27395
chr6	86667856	86668659	4.8085
chr6	87849573	87850839	4.45258
chr6	87979631	87981826	6.50327
chr6	88902630	88902880	3.28586
chr6	89095956	89096156	3.70667
chr6	90905415	90905932	4.76332
chr6	91516214	91516719	3.15728
chr6	97204857	97205181	3.70255
chr6	100286010	100286847	4.8278
chr6	100834202	100834417	3.51053
chr6	100834667	100834939	3.40224
chr6	103314520	103314812	3.68924
chr6	113077665	113078809	4.08181
chr6	113326181	113326705	4.57163
chr6	113624014	113624270	3.35663
chr6	113698328	113698638	3.2956
chr6	115675724	115676025	3.28586
chr6	115807668	115808885	3.8216
chr6	117909357	117909891	3.93368
chr6	117916384	117918795	7.21231
chr6	117925855	117926062	3.0287
chr6	118533382	118533828	3.44171
chr6	119480348	119481463	3.91684
chr6	120034825	120035316	4.13467
chr6	120036152	120038519	8.31671
chr6	120365261	120365651	3.55572
chr6	120530748	120531298	4.36031
chr6	120822391	120822601	3.28586
chr6	125163624	125163953	3.42277
chr6	125164058	125164294	3.51867
chr6	125164435	125165844	4.67655
chr6	128799422	128799757	3.28586
chr6	148354680	148355676	4.34543
chr6	148944522	148944759	3.55058
chr7	3704365	3705223	3.07373
chr7	4810423	4812290	4.1113
chr7	5079766	5080801	6.27283
chr7	7275077	7275317	4.15952
chr7	7277473	7278627	3.80017
chr7	12922318	12922724	3.16681
chr7	13024731	13025282	3.50781
chr7	13034703	13035114	3.27395
chr7	19117128	19117622	3.05966
chr7	19457587	19458197	3.27821
chr7	19586094	19586824	5.06522
chr7	24884816	24885805	4.66688
chr7	25753131	25753395	3.15728
chr7	25753636	25753844	3.77764
chr7	27174263	27174463	3.70667
chr7	28178734	28179424	5.08594
chr7	28179545	28179788	3.59979
chr7	28351182	28351746	4.27217
chr7	28378393	28378624	3.17361
chr7	28378924	28379212	3.41444
chr7	28811266	28812002	4.03977
chr7	30589573	30589773	3.57159
chr7	30598115	30598360	3.62261
chr7	30971843	30972255	3.05966
chr7	34388315	34389092	3.99787
chr7	35802761	35803036	3.29207
chr7	38018942	38019142	3.0287
chr7	44247367	44247973	5.81998
chr7	44248218	44248418	3.08758
chr7	44553744	44553957	3.67126
chr7	44816620	44816821	3.07787
chr7	45052778	45052984	3.15728
chr7	45127709	45128768	5.28595
chr7	45458283	45459291	3.90834
chr7	45459922	45460178	3.25126
chr7	45487022	45487294	3.25382
chr7	45718090	45719187	3.97835
chr7	45813349	45813832	4.09244
chr7	73538235	73538505	3.79049
chr7	73539687	73539887	3.23579
chr7	73540200	73541555	4.71385
chr7	73556352	73557518	3.90127
chr7	79464409	79465090	4.28902
chr7	80876068	80876284	3.2956
chr7	81343954	81345269	3.42223
chr7	81828110	81828350	3.5567
chr7	82869584	82869827	4.08181
chr7	90443628	90445315	6.17539
chr7	92667926	92669859	4.53989
chr7	98308529	98308907	3.49769
chr7	99482924	99483578	3.90834
chr7	100494251	100494851	4.62927
chr7	100495438	100495702	3.03585
chr7	101109913	101110155	3.14949
chr7	107209425	107211857	7.55987
chr7	109519183	109520389	4.03987
chr7	109616514	109616777	3.25382
chr7	110018388	110018775	3.88004
chr7	110059981	110060389	3.85762
chr7	110060928	110061198	3.50781
chr7	110061593	110061889	3.16151
chr7	110062365	110062669	3.28586
chr7	110122562	110123873	7.76433
chr7	111079673	111079873	3.19563
chr7	111080446	111082955	12.9292
chr7	111083108	111083340	3.09835
chr7	111122689	111122900	3.16151
chr7	111123045	111123252	3.5408
chr7	116333351	116333864	5.10892
chr7	118115096	118116022	3.77924
chr7	118127960	118128283	3.08524
chr7	118128454	118128747	3.48825
chr7	118242548	118243277	3.67159
chr7	119794298	119795411	6.99207
chr7	122067771	122068499	4.70021
chr7	122969980	122971984	8.40947
chr7	122972503	122972849	3.28586
chr7	123125124	123125505	4.31448
chr7	126500745	126502363	4.80213
chr7	126502472	126502971	4.31448
chr7	126797628	126798015	3.95645
chr7	126929673	126930018	3.34116
chr7	127024549	127026586	9.38251
chr7	127027280	127027824	3.26403
chr7	127273196	127273645	3.49769
chr7	127471630	127471982	3.40477
chr7	127511404	127511680	3.15948
chr7	127512386	127513339	3.35729
chr7	127707897	127708325	3.76039
chr7	127748049	127748357	3.01267
chr7	127748560	127749332	4.69447
chr7	127753177	127753459	4.05732
chr7	127753657	127754050	3.40224
chr7	127767280	127767480	3.28883
chr7	127768684	127768947	3.22202
chr7	127966788	127967247	3.80017
chr7	127967789	127970055	10.7892
chr7	127971226	127971503	3.57158
chr7	127976250	127976484	3.23779
chr7	128688008	128688444	4.35205
chr7	141228790	141229039	3.3811
chr7	141447806	141448571	4.02399
chr7	142283742	142283942	3.51867
chr7	142284582	142285437	3.41444
chr7	142533106	142533356	3.42277
chr7	143295137	143295582	3.97339
chr8	4324544	4324954	3.15728
chr8	13869486	13869748	3.55572
chr8	15519865	15520075	4.30377
chr8	22591662	22592247	3.17838
chr8	25200697	25201075	4.61002
chr8	26978417	26979118	3.27395
chr8	33517047	33518086	4.46449
chr8	40511190	40511488	3.41444
chr8	45009776	45010333	3.41444
chr8	45010450	45010834	3.25382
chr8	45044103	45044634	3.85762
chr8	45051065	45051275	3.55572
chr8	57511814	57514059	13.5191
chr8	57514208	57514833	3.25382
chr8	70042129	70042410	3.67204
chr8	70172377	70172673	3.83862
chr8	70331306	70331771	3.5567
chr8	70331937	70332708	6.19497
chr8	70509378	70511172	3.17361
chr8	70699456	70700441	3.91684
chr8	70700981	70701184	3.17361
chr8	70896203	70897378	6.26821
chr8	71845661	71845871	3.3811
chr8	72546824	72547845	4.02399
chr8	72723767	72725064	4.02399
chr8	75109394	75109977	3.28883
chr8	75110136	75110484	3.5954
chr8	78820859	78821139	3.8511
chr8	79640167	79640948	3.49769
chr8	81013679	81014279	3.81075
chr8	83608514	83608984	3.25907
chr8	84661136	84661769	3.44627
chr8	84840758	84841033	3.51867
chr8	84845494	84846727	6.26304
chr8	85554172	85554566	4.15952
chr8	85554698	85555273	4.31448
chr8	85825743	85826048	3.0287
chr8	88138161	88138563	4.19662
chr8	88199671	88200756	4.70021
chr8	94173096	94173526	4.19662
chr8	94179838	94180525	4.76212
chr8	94666728	94667131	3.10286
chr8	95805975	95806950	4.57163
chr8	105171739	105172167	3.57158
chr8	107085229	107085677	3.70667
chr8	107292607	107293270	3.55572
chr8	107294508	107294987	3.85762
chr8	110845655	110845956	3.82076
chr8	110970126	110970603	3.28586
chr8	111027181	111027845	4.70021
chr8	121651669	121651883	3.3811
chr8	121905054	121905623	3.57158
chr8	121905840	121906979	5.3431
chr8	121951527	121951958	3.10403
chr8	123102399	123103790	7.8575
chr8	124021949	124022181	3.05966
chr8	124022394	124022657	3.67126
chr8	125911686	125912937	4.15952
chr8	126590177	126593322	4.77062
chr9	3007464	3007664	3.17361
chr9	3024320	3024553	3.02349
chr9	3025399	3025613	3.50016
chr9	7184240	7184701	3.55572
chr9	15305723	15306087	3.06933
chr9	15306582	15307650	4.57163
chr9	21003008	21003280	3.15231
chr9	21073517	21073773	3.99489
chr9	21368050	21368624	3.92875
chr9	21616250	21616790	3.99086
chr9	25150412	25150662	3.54301
chr9	25150846	25151397	3.27395
chr9	40801271	40803048	4.94665
chr9	44178357	44179342	3.17361
chr9	44334616	44337357	8.25435
chr9	44407526	44408081	3.16978
chr9	44408280	44408674	3.80017
chr9	44767064	44767757	4.46142
chr9	52048618	52049527	5.43179
chr9	53537606	53537970	3.92874
chr9	53666354	53666615	3.41444
chr9	54660369	54660635	3.42613
chr9	54864484	54864795	3.65401
chr9	55511633	55511994	3.41444
chr9	56143149	56143349	3.10286
chr9	56223569	56223783	3.69064
chr9	57260706	57261837	3.80017
chr9	59484401	59486196	4.62521
chr9	59659845	59660115	3.50809
chr9	59766731	59767560	4.1859
chr9	61913624	61914549	5.29786
chr9	64173554	64174236	3.26545
chr9	65036325	65036579	4.28924
chr9	66512409	66512627	3.28311
chr9	66946555	66947414	3.77764
chr9	70543210	70543490	3.05966
chr9	71880509	71880709	3.10286
chr9	72110320	72110799	3.44171
chr9	72289650	72289916	3.29207
chr9	72663783	72663984	3.70667
chr9	74953560	74954378	4.46142
chr9	75038496	75038780	3.40477
chr9	78478140	78478374	3.34458
chr9	78479024	78479411	3.46193
chr9	78479575	78481652	8.04118
chr9	82973822	82974524	5.44006
chr9	86693468	86693827	3.10286
chr9	86694901	86695168	3.00338
chr9	88521587	88521789	4.11613
chr9	95858532	95858790	3.02096
chr9	96363215	96363474	3.03585
chr9	96477777	96478078	3.67159
chr9	96478454	96479007	3.92874
chr9	101074408	101076175	7.65786
chr9	103363452	103364883	4.78196
chr9	106171678	106172583	5.08594
chr9	106885269	106886816	4.64306
chr9	106887245	106887889	4.13114
chr9	106891043	106891400	3.15728
chr9	107193212	107193533	3.57158
chr9	107769370	107769623	3.70667
chr9	108392622	108393290	4.46142
chr9	108393431	108393902	3.55572
chr9	108394117	108394411	3.40477
chr9	108517762	108518103	3.73741
chr9	108518239	108518520	3.35034
chr9	108559938	108560774	4.2757
chr9	108565985	108566825	3.80969
chr9	109876177	109876638	3.36595
chr9	110380461	110381374	4.77402
chr9	110532019	110532326	4.00862
chr9	110532989	110533872	3.66088
chr9	110534002	110534281	3.16996
chr9	111312218	111314052	5.3431
chr9	111314627	111314993	3.27395
chr9	113931692	113931951	3.62073
chr9	114561201	114562464	5.21617
chr9	119418391	119418798	3.40477
chr9	121719512	121719890	3.16834
chr9	123461845	123462158	6.49209
chr9	124423847	124424052	3.16681
chrX	7040670	7041050	3.10286
chrX	7947012	7947257	3.10286
chrX	8144218	8145227	4.31047
chrX	13072606	13074236	5.06522
chrX	36329936	36330316	4.46142
chrX	36490430	36490776	4.31047
chrX	36490876	36491494	4.31047
chrX	38564662	38564928	3.40477
chrX	51799792	51800938	4.76332
chrX	57054222	57054422	3.40477
chrX	60891815	60892668	5.81998
chrX	66874661	66875653	5.06522
chrX	66875768	66876304	4.00857
chrX	68679245	68680240	3.55572
chrX	89408642	89409583	5.21617
chrX	93921623	93922186	3.70667
chrX	94235875	94236083	3.10286
chrX	94540870	94541459	3.41444
chrX	100429519	100430116	5.21617
chrX	101429781	101430091	3.80017
chrX	101695734	101696044	3.10286
chrX	101697905	101698599	3.10286
chrX	101793763	101794173	3.40477
chrX	103979832	103980079	3.10286
chrX	103980351	103980583	3.55572
chrX	106219288	106219910	4.05732
chrX	106220816	106221089	3.40477
chrX	134474669	134475743	5.72883
chrX	136740053	136740295	3.10286
chrX	137118081	137119310	4.15952
chrX	139211468	139212124	4.00857
chrX	139212488	139213260	3.55572
chrX	139217019	139217411	3.25382
chrX	140597513	140597713	3.40477
chrX	140597878	140598707	5.97093
chrX	140812751	140813372	4.31448
chrX	151522486	151522916	3.70667
chrX	151803865	151804335	3.70667
chrX	153500179	153500473	3.70667
chrX	161157374	161158023	4.15952
chrX	161162832	161163322	3.70667
chrX	162761178	162762216	4.46142
chrX	162762447	162762673	3.10286
chrX	169986806	169987352	3.23994
chrY	90737422	90740742	11.3775
chrY	90740852	90744965	10.4051
chrY	90760224	90760497	5.51808
chrY	90797085	90798778	3.76883
chrY	90800737	90802465	4.05535
chrY	90803423	90807218	3.00728
chrY	90807648	90809211	3.98746
chrY	90812414	90813038	4.18151
