# Supplementary material for: The histone modification reader ZCWPW1 links histone methylation to PRDM9-induced double-strand break repair
Source: eLife. 2020 May 6;9:e53459. doi: 10.7554/eLife.53459 (PMC7314539; doi:10.7554/eLife.53459)
Supplement: Supplementary file 3. [file elife-53459-supp3.xlsx]

## Sheet: Sheet1
Down-regulated and up-regulated genes in Zcwpw1−/−(vs WT) whose promoters overlap with ZCWPW1 peaks
down-regulated	up-regulated
1700001G11Rik	Gm6268
1700009C05Rik	Otud6a
1700010I14Rik
1700020N18Rik
1700029M20Rik
1700102P08Rik
4930444F02Rik
4930488L21Rik
5330417C22Rik
Adam2
Armt1
Asrgl1
BC048644
Ccdc173
Ccdc42
Clgn
Cntd1
Cox8c
D130017N08Rik
Dnajc5g
Eid3
Fam229b
Gm11837
Gm21948
Gm2762
Gm9731
Hsf5
Id4
Kctd7
Ldhal6b
Limd2
Lrrc61
Mir7229
Ndufaf3
Papolb
Pbx4
Pdcl2
Phf7
Ppp1r36
Ptchd3
Smim24
Smpd5
Tcam1
Ttc30a2
Ube2d2b
