# Supplementary figures and images for: The histone modification reader ZCWPW1 links histone methylation to PRDM9-induced double-strand break repair
Source: eLife journal article supplement (doi:10.7554/elife.53459), 2020-05-06

Figure 1–figure supplement 2

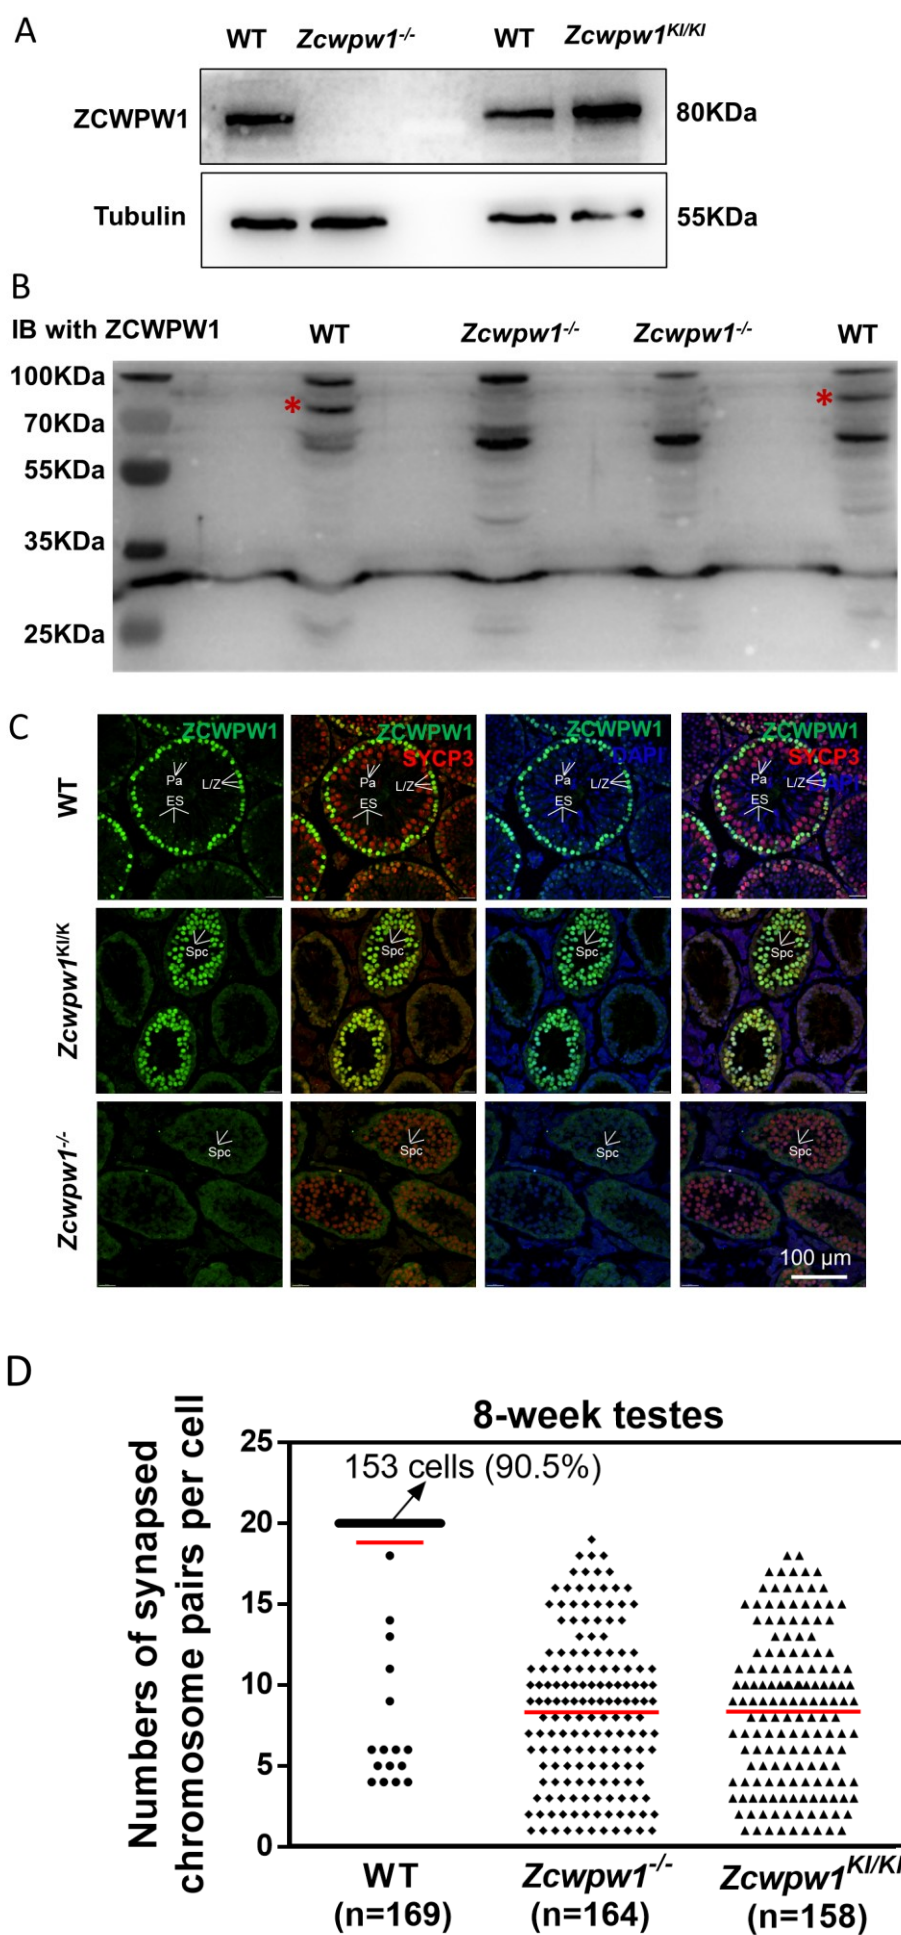

Supplement: supp [file elife-53459-supp-v1.zip]
